# Supplementary material for: Allele-Specific Gene Expression Is Widespread Across the Genome and Biological Processes
Source: PubMed Central journal article supplement (PMC2613524; doi:10.1371/journal.pone.0004150), 2009-01-07
Supplement: pone.0004150.s002.pdf [file pone.0004150.s002.pdf]

| Gene Ontology : biological process. Level: 3 | Percentage of genes with allele-specific expression | Percentage of genes without allele-specific expression | Unadjusted pvalue | Adjusted pvalueFDR |
|----------------------------------------------|-----------------------------------------------------|--------------------------------------------------------|-------------------|--------------------|
| neurological process                         | 7.17                                                | 12.1                                                   | 1.73E-03          | 1                  |
| tissue remodeling                            | 0.56                                                | 2.38                                                   | 2.30E-03          | 1                  |
| primary metabolic process                    | 54.74                                               | 48.16                                                  | 1.65E-02          | 1                  |
| macromolecule metabolic process              | 47.57                                               | 41.25                                                  | 2.19E-02          | 1                  |
| response to abiotic stimulus                 | 0.64                                                | 1.94                                                   | 2.45E-02          | 1                  |
| cell communication                           | 32.83                                               | 38.66                                                  | 2.56E-02          | 1                  |
| behavior                                     | 3.27                                                | 5.4                                                    | 4.75E-02          | 1                  |
| cellular metabolic process                   | 55.86                                               | 50.76                                                  | 6.35E-02          | 1                  |
| digestion                                    | 0.32                                                | 1.08                                                   | 6.52E-02          | 1                  |
| circulation                                  | 1.04                                                | 2.16                                                   | 9.48E-02          | 1                  |
| detection of stimulus                        | 0.4                                                 | 1.08                                                   | 1.45E-01          | 1                  |
| developmental growth                         | 0.48                                                | 0                                                      | 2.00E-01          | 1                  |
| molting cycle                                | 0.56                                                | 0                                                      | 2.00E-01          | 1                  |
| endocrine process                            | 0                                                   | 0.22                                                   | 2.69E-01          | 1                  |
| sleep                                        | 0                                                   | 0.22                                                   | 2.69E-01          | 1                  |
| multicellular organismal homeostasis         | 0.16                                                | 0.43                                                   | 2.95E-01          | 1                  |
| organismal movement                          | 0.16                                                | 0.43                                                   | 2.95E-01          | 1                  |
| death                                        | 6.22                                                | 4.97                                                   | 3.57E-01          | 1                  |
| catabolic process                            | 4.3                                                 | 5.4                                                    | 3.63E-01          | 1                  |
| regulation of a molecular function           | 3.19                                                | 4.1                                                    | 3.71E-01          | 1                  |
| coagulation                                  | 0.96                                                | 0.43                                                   | 3.76E-01          | 1                  |
| aging                                        | 0.32                                                | 0.65                                                   | 3.95E-01          | 1                  |
| response to stress                           | 7.81                                                | 6.48                                                   | 4.08E-01          | 1                  |
| regulation of biological quality             | 2.07                                                | 1.3                                                    | 4.20E-01          | 1                  |
| localization of cell                         | 5.18                                                | 4.1                                                    | 4.49E-01          | 1                  |
| thermoregulation                             | 0.08                                                | 0.22                                                   | 4.66E-01          | 1                  |
| organ growth                                 | 0.08                                                | 0.22                                                   | 4.66E-01          | 1                  |
| cellular developmental process               | 16.57                                               | 15.12                                                  | 5.07E-01          | 1                  |
| autophagy                                    | 0.24                                                | 0                                                      | 5.68E-01          | 1                  |
| homeostasis of number of cells               | 0.24                                                | 0                                                      | 5.68E-01          | 1                  |
| body growth                                  | 0.24                                                | 0                                                      | 5.68E-01          | 1                  |
| interspecies interaction between organisms   | 0.24                                                | 0                                                      | 5.68E-01          | 1                  |
| cell organization and biogenesis             | 18.41                                               | 17.06                                                  | 5.72E-01          | 1                  |
| defense response                             | 4.38                                                | 3.67                                                   | 5.88E-01          | 1                  |
| cell proliferation                           | 6.85                                                | 7.56                                                   | 5.97E-01          | 1                  |

|                                                  |       |       |           |   |
|--------------------------------------------------|-------|-------|-----------|---|
| response to external stimulus                    | 5.26  | 4.54  | 6.20E-01  | 1 |
| muscle contraction                               | 1.35  | 1.73  | 6.50E-01  | 1 |
| response to chemical stimulus                    | 3.27  | 3.67  | 6.54E-01  | 1 |
| regulation of biological process                 | 35.86 | 34.77 | 0.6912833 | 1 |
| response to endogenous stimulus                  | 2.31  | 1.94  | 0.7156244 | 1 |
| cell activation                                  | 2.39  | 1.94  | 0.7157399 | 1 |
| response to biotic stimulus                      | 2.31  | 2.59  | 0.7234653 | 1 |
| synapse organization and biogenesis              | 0.56  | 0.65  | 0.7345141 | 1 |
| multicellular organismal development             | 22.47 | 21.6  | 0.7438192 | 1 |
| establishment of localization                    | 20.96 | 20.3  | 0.7890163 | 1 |
| developmental maturation                         | 1.12  | 0.86  | 0.7934371 | 1 |
| cell homeostasis                                 | 1.99  | 1.73  | 0.8442724 | 1 |
| chemical homeostasis                             | 2.07  | 2.16  | 0.8518755 | 1 |
| protein localization                             | 6.29  | 6.05  | 0.9107316 | 1 |
| cell adhesion                                    | 7.65  | 7.78  | 0.918937  | 1 |
| anatomical structure development                 | 21.35 | 21.6  | 0.9471706 | 1 |
| RNA localization                                 | 0.32  | 0.22  | 1         | 1 |
| maintenance of localization                      | 0.16  | 0     | 1         | 1 |
| behavioral interaction between organisms         | 0.4   | 0.22  | 1         | 1 |
| cell division                                    | 1.67  | 1.51  | 1         | 1 |
| reproductive process                             | 1.67  | 1.51  | 1         | 1 |
| biosynthetic process                             | 9     | 8.86  | 1         | 1 |
| regulation of body fluids                        | 1.04  | 0.86  | 1         | 1 |
| cell recognition                                 | 0.48  | 0.43  | 1         | 1 |
| nitrogen compound metabolic process              | 2.79  | 2.59  | 1         | 1 |
| secondary metabolic process                      | 0.24  | 0.22  | 1         | 1 |
| respiratory gaseous exchange                     | 0.32  | 0.22  | 1         | 1 |
| cytokine production                              | 1.12  | 1.08  | 1         | 1 |
| pigmentation during development                  | 0.16  | 0.22  | 1         | 1 |
| cell cycle                                       | 7.09  | 6.91  | 1         | 1 |
| membrane docking                                 | 0.4   | 0.22  | 1         | 1 |
| sexual reproduction                              | 1.99  | 1.94  | 1         | 1 |
| chromosome segregation                           | 0.4   | 0.43  | 1         | 1 |
| extracellular matrix organization and biogenesis | 0.64  | 0.43  | 1         | 1 |
| circadian rhythm                                 | 0.24  | 0.22  | 1         | 1 |
| excretion                                        | 0.32  | 0.22  | 1         | 1 |

immune system process

7.17

7.13

1

1

| Gene Ontology : biological process. Level: 4   | Percentage of genes with allele-specific expression | Percentage of genes without allele-specific expression | Unadjusted pvalue | Adjusted pvalueFDR |
|------------------------------------------------|-----------------------------------------------------|--------------------------------------------------------|-------------------|--------------------|
| protein metabolic process                      | 27.54                                               | 20.88                                                  | 0.005665717       | 1                  |
| sensory perception                             | 3.85                                                | 6.81                                                   | 0.01311375        | 1                  |
| cellular macromolecule metabolic process       | 26.15                                               | 20.44                                                  | 0.01545811        | 1                  |
| bone remodeling                                | 0.57                                                | 1.98                                                   | 0.01897887        | 1                  |
| biopolymer metabolic process                   | 38.36                                               | 32.53                                                  | 0.03037133        | 1                  |
| adult behavior                                 | 0.25                                                | 1.1                                                    | 0.03826845        | 1                  |
| phosphorus metabolic process                   | 9.43                                                | 6.15                                                   | 0.03852618        | 1                  |
| detection of external stimulus                 | 0.16                                                | 0.88                                                   | 0.04988037        | 1                  |
| positive regulation of biological process      | 11.31                                               | 8.13                                                   | 0.05967504        | 1                  |
| detection of abiotic stimulus                  | 0.08                                                | 0.66                                                   | 0.06361406        | 1                  |
| glucose homeostasis                            | 0.08                                                | 0.66                                                   | 0.06361406        | 1                  |
| rhythmic behavior                              | 0                                                   | 0.44                                                   | 0.07367107        | 1                  |
| regulation of binding                          | 0                                                   | 0.44                                                   | 0.07367107        | 1                  |
| response to radiation                          | 0.41                                                | 1.32                                                   | 0.07998575        | 1                  |
| regulation of locomotion                       | 0.49                                                | 1.32                                                   | 0.09926941        | 1                  |
| learning and/or memory                         | 0.82                                                | 1.76                                                   | 0.111236          | 1                  |
| response to organic substance                  | 0.16                                                | 0.66                                                   | 0.1273231         | 1                  |
| cell aging                                     | 0.16                                                | 0.66                                                   | 0.1273231         | 1                  |
| signal transduction                            | 30.25                                               | 34.07                                                  | 0.1388143         | 1                  |
| regulation of growth                           | 1.64                                                | 0.66                                                   | 0.1583784         | 1                  |
| response to wounding                           | 3.93                                                | 2.42                                                   | 0.1787818         | 1                  |
| regulation of blood vessel size                | 0.08                                                | 0.44                                                   | 0.1811172         | 1                  |
| smooth muscle contraction                      | 0.08                                                | 0.44                                                   | 0.1811172         | 1                  |
| drug metabolic process                         | 0.08                                                | 0.44                                                   | 0.1811172         | 1                  |
| hair cycle                                     | 0.57                                                | 0                                                      | 0.2000642         | 1                  |
| molting cycle process                          | 0.57                                                | 0                                                      | 0.2000642         | 1                  |
| regulation of multicellular organismal process | 2.87                                                | 4.18                                                   | 0.2123753         | 1                  |
| embryonic development                          | 3.69                                                | 2.42                                                   | 0.2238763         | 1                  |
| cell-cell signaling                            | 7.05                                                | 8.79                                                   | 0.2517451         | 1                  |
| cellular catabolic process                     | 3.77                                                | 5.05                                                   | 0.2683857         | 1                  |
| response to gravity                            | 0                                                   | 0.22                                                   | 0.2716418         | 1                  |
| homeiothermy                                   | 0                                                   | 0.22                                                   | 0.2716418         | 1                  |
| response to mechanical stimulus                | 0                                                   | 0.22                                                   | 0.2716418         | 1                  |
| chemosensory behavior                          | 0                                                   | 0.22                                                   | 0.2716418         | 1                  |
| striated muscle contraction                    | 0.16                                                | 0.44                                                   | 0.2986204         | 1                  |

|                                                         |       |       |           |   |
|---------------------------------------------------------|-------|-------|-----------|---|
| glycerol ether metabolic process                        | 0.16  | 0.44  | 0.2986204 | 1 |
| cytokinesis                                             | 0.16  | 0.44  | 0.2986204 | 1 |
| tissue homeostasis                                      | 0.16  | 0.44  | 0.2986204 | 1 |
| antigen processing and presentation                     | 0.41  | 0     | 0.3318527 | 1 |
| interleukin-6 production                                | 0.41  | 0     | 0.3318527 | 1 |
| response to drug                                        | 0.25  | 0.66  | 0.3535703 | 1 |
| alkene metabolic process                                | 0.25  | 0.66  | 0.3535703 | 1 |
| locomotory behavior                                     | 2.13  | 2.86  | 0.367473  | 1 |
| cell motility                                           | 5.33  | 4.18  | 0.3797009 | 1 |
| organelle organization and biogenesis                   | 9.34  | 7.91  | 0.3878559 | 1 |
| macromolecule catabolic process                         | 2.7   | 3.52  | 0.4150318 | 1 |
| response to other organism                              | 1.72  | 2.42  | 0.4213928 | 1 |
| nucleobase, nucleoside, nucleotide and nucleic acid met | 25.25 | 23.3  | 0.4448913 | 1 |
| response to protein stimulus                            | 0.66  | 0.22  | 0.4584797 | 1 |
| cell differentiation                                    | 17.05 | 15.38 | 0.4604103 | 1 |
| alcohol metabolic process                               | 2.54  | 1.76  | 0.4659934 | 1 |
| interferon-gamma production                             | 0.08  | 0.22  | 0.4696125 | 1 |
| detection of chemical stimulus                          | 0.08  | 0.22  | 0.4696125 | 1 |
| response to temperature stimulus                        | 0.08  | 0.22  | 0.4696125 | 1 |
| response to pain                                        | 0.08  | 0.22  | 0.4696125 | 1 |
| musculoskeletal movement                                | 0.08  | 0.22  | 0.4696125 | 1 |
| sulfur metabolic process                                | 0.49  | 0.88  | 0.4741691 | 1 |
| anatomical structure morphogenesis                      | 11.48 | 10.11 | 0.4843789 | 1 |
| oxygen and reactive oxygen species metabolic process    | 0.57  | 0.88  | 0.5027782 | 1 |
| reproductive developmental process                      | 0.57  | 0.88  | 0.5027782 | 1 |
| cofactor metabolic process                              | 1.64  | 1.1   | 0.5031182 | 1 |
| immune response                                         | 4.51  | 5.27  | 0.5180336 | 1 |
| appendage development                                   | 0.82  | 0.44  | 0.5305785 | 1 |
| pattern specification process                           | 1.89  | 1.32  | 0.5307622 | 1 |
| negative regulation of biological process               | 11.89 | 10.77 | 0.5491735 | 1 |
| regulation of cellular process                          | 31.97 | 30.33 | 0.5544919 | 1 |
| regulation of coagulation                               | 0.25  | 0     | 0.5672571 | 1 |
| response to hormone stimulus                            | 0.25  | 0     | 0.5672571 | 1 |
| symbiosis, encompassing mutualism through parasitism    | 0.25  | 0     | 0.5672571 | 1 |
| aldehyde metabolic process                              | 0.25  | 0     | 0.5672571 | 1 |
| leukocyte homeostasis                                   | 0.25  | 0     | 0.5672571 | 1 |

|                                             |       |       |           |   |
|---------------------------------------------|-------|-------|-----------|---|
| regulation of metabolic process             | 18.77 | 20    | 0.5765539 | 1 |
| response to extracellular stimulus          | 0.33  | 0     | 0.5796803 | 1 |
| regulation of response to stimulus          | 0.33  | 0     | 0.5796803 | 1 |
| epithelial cell proliferation               | 0.25  | 0.44  | 0.6173481 | 1 |
| interleukin-2 production                    | 0.25  | 0.44  | 0.6173481 | 1 |
| fear response                               | 0.25  | 0.44  | 0.6173481 | 1 |
| aromatic compound metabolic process         | 1.56  | 1.1   | 0.6450092 | 1 |
| regulation of catalytic activity            | 3.28  | 3.74  | 0.6506001 | 1 |
| response to xenobiotic stimulus             | 0.33  | 0.44  | 0.6656493 | 1 |
| organic acid metabolic process              | 3.69  | 4.18  | 0.6677004 | 1 |
| gametogenesis                               | 1.97  | 1.54  | 0.6855553 | 1 |
| response to DNA damage stimulus             | 2.13  | 1.76  | 0.7016256 | 1 |
| leukocyte activation                        | 2.38  | 1.98  | 0.7149152 | 1 |
| heterocycle metabolic process               | 0.74  | 0.44  | 0.7371745 | 1 |
| vitamin metabolic process                   | 0.74  | 0.44  | 0.7371745 | 1 |
| cell cycle process                          | 6.31  | 6.81  | 0.7373835 | 1 |
| hormone metabolic process                   | 0.66  | 0.88  | 0.744756  | 1 |
| one-carbon compound metabolic process       | 0.66  | 0.88  | 0.744756  | 1 |
| regulation of developmental process         | 3.28  | 2.86  | 0.7547742 | 1 |
| hemostasis                                  | 0.98  | 0.66  | 0.771524  | 1 |
| lipid metabolic process                     | 5.25  | 5.49  | 0.8078098 | 1 |
| cellular localization                       | 5.41  | 5.71  | 0.8099349 | 1 |
| tube development                            | 1.39  | 1.1   | 0.8106824 | 1 |
| ion homeostasis                             | 1.89  | 1.54  | 0.8360171 | 1 |
| transport                                   | 20.82 | 20.22 | 0.8387658 | 1 |
| amino acid and derivative metabolic process | 2.21  | 1.98  | 0.8518027 | 1 |
| membrane organization and biogenesis        | 2.54  | 2.64  | 0.8638721 | 1 |
| cell-cell adhesion                          | 2.95  | 3.08  | 0.8726646 | 1 |
| carbohydrate metabolic process              | 3.61  | 3.3   | 0.8817467 | 1 |
| macromolecule complex assembly              | 3.77  | 3.96  | 0.8862178 | 1 |
| system development                          | 19.1  | 18.68 | 0.8886906 | 1 |
| mitotic cell cycle                          | 1.89  | 1.76  | 1         | 1 |
| response to toxin                           | 0.08  | 0     | 1         | 1 |
| response to inorganic substance             | 0.08  | 0     | 1         | 1 |
| maintenance of protein localization         | 0.08  | 0     | 1         | 1 |
| cellular biosynthetic process               | 8.28  | 8.35  | 1         | 1 |

|                                                  |      |      |   |   |
|--------------------------------------------------|------|------|---|---|
| feeding behavior                                 | 0.41 | 0.44 | 1 | 1 |
| stem cell division                               | 0.08 | 0    | 1 | 1 |
| interleukin-8 production                         | 0.08 | 0    | 1 | 1 |
| interleukin-13 production                        | 0.08 | 0    | 1 | 1 |
| generation of precursor metabolites and energy   | 3.61 | 3.52 | 1 | 1 |
| cellular structure disassembly                   | 0.25 | 0.22 | 1 | 1 |
| fertilization                                    | 0.16 | 0.22 | 1 | 1 |
| cell-cell recognition                            | 0.08 | 0    | 1 | 1 |
| interleukin-1 production                         | 0.08 | 0    | 1 | 1 |
| viral reproductive process                       | 0.41 | 0.22 | 1 | 1 |
| reproductive process in a multicellular organism | 0.57 | 0.44 | 1 | 1 |
| chemokine production                             | 0.08 | 0    | 1 | 1 |
| pigment metabolic process                        | 0.16 | 0    | 1 | 1 |
| nitric oxide metabolic process                   | 0.16 | 0.22 | 1 | 1 |
| smooth muscle cell proliferation                 | 0.08 | 0    | 1 | 1 |
| response to tumor cell                           | 0.08 | 0    | 1 | 1 |
| cytoplasm organization and biogenesis            | 0.16 | 0.22 | 1 | 1 |
| amine metabolic process                          | 2.7  | 2.64 | 1 | 1 |
| urea cycle intermediate metabolic process        | 0.08 | 0    | 1 | 1 |
| secretion                                        | 2.95 | 2.86 | 1 | 1 |
| establishment of protein localization            | 6.07 | 5.93 | 1 | 1 |
| collagen fibril organization                     | 0.16 | 0.22 | 1 | 1 |
| cholesterol homeostasis                          | 0.08 | 0    | 1 | 1 |
| response to osmotic stress                       | 0.16 | 0    | 1 | 1 |
| blood pressure regulation                        | 0.25 | 0.22 | 1 | 1 |
| endothelial cell proliferation                   | 0.16 | 0.22 | 1 | 1 |
| keratinocyte proliferation                       | 0.08 | 0    | 1 | 1 |
| response to hypoxia                              | 0.08 | 0    | 1 | 1 |
| reproductive behavior                            | 0.33 | 0.22 | 1 | 1 |
| interleukin-12 production                        | 0.16 | 0.22 | 1 | 1 |
| cellular defense response                        | 0.33 | 0.22 | 1 | 1 |
| cell redox homeostasis                           | 0.08 | 0    | 1 | 1 |
| neuromuscular process                            | 0.16 | 0.22 | 1 | 1 |
| regulation of cytokine production                | 0.08 | 0    | 1 | 1 |
| peptide metabolic process                        | 0.16 | 0.22 | 1 | 1 |
| sequestering of metal ion                        | 0.08 | 0    | 1 | 1 |

|                                                          |      |      |   |   |
|----------------------------------------------------------|------|------|---|---|
| macroautophagy                                           | 0.08 | 0    | 1 | 1 |
| social behavior                                          | 0.08 | 0    | 1 | 1 |
| meiotic cell cycle                                       | 0.57 | 0.44 | 1 | 1 |
| establishment of RNA localization                        | 0.33 | 0.22 | 1 | 1 |
| detection of biotic stimulus                             | 0.16 | 0.22 | 1 | 1 |
| ribonucleoprotein complex biogenesis and assembly        | 0.82 | 0.88 | 1 | 1 |
| interleukin-4 production                                 | 0.08 | 0    | 1 | 1 |
| osmoregulation                                           | 0.08 | 0    | 1 | 1 |
| fibroblast proliferation                                 | 0.16 | 0.22 | 1 | 1 |
| detection of endogenous stimulus                         | 0.08 | 0    | 1 | 1 |
| neuron recognition                                       | 0.25 | 0.22 | 1 | 1 |
| granulocyte macrophage colony-stimulating factor produ   | 0.16 | 0    | 1 | 1 |
| cell-substrate adhesion                                  | 0.41 | 0.44 | 1 | 1 |
| regulation of gene expression, epigenetic                | 0.33 | 0.22 | 1 | 1 |
| asymmetric cell division                                 | 0.16 | 0    | 1 | 1 |
| tumor necrosis factor-beta production                    | 0.16 | 0    | 1 | 1 |
| metabolic compound salvage                               | 0.16 | 0    | 1 | 1 |
| entrainment of circadian clock                           | 0.08 | 0    | 1 | 1 |
| interleukin-3 production                                 | 0.08 | 0    | 1 | 1 |
| grooming behavior                                        | 0.08 | 0    | 1 | 1 |
| external encapsulating structure organization and bioger | 0.16 | 0    | 1 | 1 |
| behavioral defense response                              | 0.16 | 0.22 | 1 | 1 |



| Gene Ontology : biological process. Level: 5            | Percentage of genes with allele-specific expression | Percentage of genes without allele-specific expression | Unadjusted pvalue | Adjusted pvalueFDR |
|---------------------------------------------------------|-----------------------------------------------------|--------------------------------------------------------|-------------------|--------------------|
| biopolymer modification                                 | 17.88                                               | 11.14                                                  | 0.000946105       | 1                  |
| sensory perception of chemical stimulus                 | 0.94                                                | 3.02                                                   | 0.004519434       | 1                  |
| cell surface receptor linked signal transduction        | 13.34                                               | 18.79                                                  | 0.008701017       | 1                  |
| cellular protein metabolic process                      | 26.95                                               | 20.88                                                  | 0.01376415        | 1                  |
| regulation of bone remodeling                           | 0                                                   | 0.7                                                    | 0.01944723        | 1                  |
| phosphate metabolic process                             | 9.84                                                | 6.5                                                    | 0.03816538        | 1                  |
| sensory perception of light stimulus                    | 1.54                                                | 3.02                                                   | 0.06615464        | 1                  |
| response to amphetamine                                 | 0                                                   | 0.46                                                   | 0.07243981        | 1                  |
| vasoconstriction                                        | 0                                                   | 0.46                                                   | 0.07243981        | 1                  |
| positive regulation of cellular process                 | 9.32                                                | 6.5                                                    | 0.08640517        | 1                  |
| polysaccharide metabolic process                        | 0.26                                                | 0.93                                                   | 0.08936988        | 1                  |
| transmission of nerve impulse                           | 4.11                                                | 6.03                                                   | 0.1083607         | 1                  |
| regulation of cell adhesion                             | 0.68                                                | 0                                                      | 0.1176141         | 1                  |
| nitrogen compound biosynthetic process                  | 0.6                                                 | 1.39                                                   | 0.1246316         | 1                  |
| female gamete generation                                | 0.17                                                | 0.7                                                    | 0.1246602         | 1                  |
| sulfur compound biosynthetic process                    | 0.17                                                | 0.7                                                    | 0.1246602         | 1                  |
| regulation of transferase activity                      | 1.97                                                | 3.25                                                   | 0.1359861         | 1                  |
| urogenital system development                           | 0.68                                                | 1.62                                                   | 0.1379155         | 1                  |
| response to light stimulus                              | 0.43                                                | 1.16                                                   | 0.1450318         | 1                  |
| negative regulation of multicellular organismal process | 0.09                                                | 0.46                                                   | 0.178425          | 1                  |
| detection of stimulus during sensory perception         | 0.09                                                | 0.46                                                   | 0.178425          | 1                  |
| regulation of cell motility                             | 0.51                                                | 1.16                                                   | 0.1786355         | 1                  |
| response to bacterium                                   | 0.51                                                | 1.16                                                   | 0.1786355         | 1                  |
| cell fate commitment                                    | 0.86                                                | 1.62                                                   | 0.1802032         | 1                  |
| embryonic development (sensu Metazoa)                   | 1.37                                                | 0.46                                                   | 0.1812811         | 1                  |
| biopolymer catabolic process                            | 2.05                                                | 3.25                                                   | 0.1938639         | 1                  |
| hair cycle process                                      | 0.6                                                 | 0                                                      | 0.1999694         | 1                  |
| water-soluble vitamin metabolic process                 | 0.6                                                 | 0                                                      | 0.1999694         | 1                  |
| nucleoside metabolic process                            | 0.51                                                | 0                                                      | 0.2000239         | 1                  |
| nuclear organization and biogenesis                     | 0.51                                                | 0                                                      | 0.2000239         | 1                  |
| intracellular signaling cascade                         | 15.4                                                | 12.76                                                  | 0.2030225         | 1                  |
| inflammatory response                                   | 2.82                                                | 1.62                                                   | 0.2079993         | 1                  |
| cellular macromolecule catabolic process                | 2.48                                                | 3.71                                                   | 0.2314653         | 1                  |
| positive regulation of metabolic process                | 4.11                                                | 2.78                                                   | 0.2386537         | 1                  |
| ion transport                                           | 7.44                                                | 9.28                                                   | 0.2512664         | 1                  |

|                                                           |       |      |           |   |
|-----------------------------------------------------------|-------|------|-----------|---|
| cofactor biosynthetic process                             | 1.2   | 0.46 | 0.2619532 | 1 |
| fluid secretion                                           | 0     | 0.23 | 0.269375  | 1 |
| cocaine metabolic process                                 | 0     | 0.23 | 0.269375  | 1 |
| mechanosensory behavior                                   | 0     | 0.23 | 0.269375  | 1 |
| response to alkaloid                                      | 0     | 0.23 | 0.269375  | 1 |
| response to carbohydrate stimulus                         | 0     | 0.23 | 0.269375  | 1 |
| endothelial cell differentiation                          | 0     | 0.23 | 0.269375  | 1 |
| fast regulation of arterial pressure                      | 0     | 0.23 | 0.269375  | 1 |
| sequestering of lipid                                     | 0     | 0.23 | 0.269375  | 1 |
| antibiotic metabolic process                              | 0     | 0.23 | 0.269375  | 1 |
| retinal homeostasis                                       | 0     | 0.23 | 0.269375  | 1 |
| urothelial cell proliferation                             | 0     | 0.23 | 0.269375  | 1 |
| detection of gravity                                      | 0     | 0.23 | 0.269375  | 1 |
| microtubule organizing center organization and biogenesis | 0     | 0.23 | 0.269375  | 1 |
| response to ethanol                                       | 0     | 0.23 | 0.269375  | 1 |
| dosage compensation                                       | 0     | 0.23 | 0.269375  | 1 |
| organic acid catabolic process                            | 0     | 0.23 | 0.269375  | 1 |
| regulation of posture                                     | 0     | 0.23 | 0.269375  | 1 |
| exocrine system development                               | 0     | 0.23 | 0.269375  | 1 |
| eating behavior                                           | 0     | 0.23 | 0.269375  | 1 |
| parturition                                               | 0     | 0.23 | 0.269375  | 1 |
| circadian behavior                                        | 0     | 0.23 | 0.269375  | 1 |
| regulation of DNA binding                                 | 0     | 0.23 | 0.269375  | 1 |
| nervous system development                                | 10.01 | 8.12 | 0.290489  | 1 |
| cellular lipid metabolic process                          | 4.45  | 5.8  | 0.291837  | 1 |
| response to fungus                                        | 0.17  | 0.46 | 0.2946967 | 1 |
| fat-soluble vitamin metabolic process                     | 0.17  | 0.46 | 0.2946967 | 1 |
| mesenchymal cell differentiation                          | 0.17  | 0.46 | 0.2946967 | 1 |
| photoreceptor cell differentiation                        | 0.17  | 0.46 | 0.2946967 | 1 |
| hormone biosynthetic process                              | 0.17  | 0.46 | 0.2946967 | 1 |
| calcium-dependent cell-cell adhesion                      | 0.17  | 0.46 | 0.2946967 | 1 |
| regulation of catabolic process                           | 0.17  | 0.46 | 0.2946967 | 1 |
| alcohol catabolic process                                 | 0.77  | 0.23 | 0.3044141 | 1 |
| cytoskeleton organization and biogenesis                  | 5.73  | 4.41 | 0.3204322 | 1 |
| regulation of heart contraction                           | 0.6   | 1.16 | 0.3239519 | 1 |
| regulation of cyclase activity                            | 0.43  | 0    | 0.3323761 | 1 |

|                                           |       |       |           |   |
|-------------------------------------------|-------|-------|-----------|---|
| negative regulation of growth             | 0.43  | 0     | 0.3323761 | 1 |
| regulation of lyase activity              | 0.43  | 0     | 0.3323761 | 1 |
| protein secretion                         | 0.43  | 0     | 0.3323761 | 1 |
| DNA damage response, signal transduction  | 0.43  | 0     | 0.3323761 | 1 |
| mitochondrion organization and biogenesis | 0.43  | 0     | 0.3323761 | 1 |
| regulation of signal transduction         | 4.96  | 3.71  | 0.3479831 | 1 |
| response to oxidative stress              | 0.26  | 0.7   | 0.3524705 | 1 |
| adult locomotory behavior                 | 0.26  | 0.7   | 0.3524705 | 1 |
| lipid catabolic process                   | 0.68  | 1.16  | 0.3534935 | 1 |
| regulation of immune system process       | 1.03  | 0.46  | 0.3755928 | 1 |
| reproductive structure development        | 0.34  | 0.7   | 0.3951182 | 1 |
| cell morphogenesis                        | 6.07  | 4.87  | 0.3984851 | 1 |
| membrane invagination                     | 2.14  | 1.39  | 0.4167417 | 1 |
| organ development                         | 13.94 | 15.55 | 0.4224799 | 1 |
| regionalization                           | 1.28  | 0.7   | 0.4287577 | 1 |
| sensory perception of mechanical stimulus | 1.28  | 0.7   | 0.4287577 | 1 |
| cell development                          | 12.4  | 10.9  | 0.4363132 | 1 |
| heterophilic cell adhesion                | 0.43  | 0.7   | 0.4508248 | 1 |
| amine transport                           | 0.68  | 0.23  | 0.4585975 | 1 |
| regulation of secretion                   | 0.68  | 0.23  | 0.4585975 | 1 |
| response to unfolded protein              | 0.68  | 0.23  | 0.4585975 | 1 |
| endosome organization and biogenesis      | 0.09  | 0.23  | 0.4663102 | 1 |
| Golgi organization and biogenesis         | 0.09  | 0.23  | 0.4663102 | 1 |
| vesicle organization and biogenesis       | 0.09  | 0.23  | 0.4663102 | 1 |
| superoxide metabolic process              | 0.09  | 0.23  | 0.4663102 | 1 |
| aromatic compound biosynthetic process    | 0.09  | 0.23  | 0.4663102 | 1 |
| bone resorption                           | 0.09  | 0.23  | 0.4663102 | 1 |
| digestive process                         | 0.09  | 0.23  | 0.4663102 | 1 |
| regulation of balance                     | 0.09  | 0.23  | 0.4663102 | 1 |
| detection of calcium ion                  | 0.09  | 0.23  | 0.4663102 | 1 |
| cell activation during immune response    | 0.09  | 0.23  | 0.4663102 | 1 |
| negative regulation of locomotion         | 0.09  | 0.23  | 0.4663102 | 1 |
| calcium-independent cell-cell adhesion    | 0.09  | 0.23  | 0.4663102 | 1 |
| response to cold                          | 0.09  | 0.23  | 0.4663102 | 1 |
| regulation of oxidoreductase activity     | 0.09  | 0.23  | 0.4663102 | 1 |
| glycerol ether biosynthetic process       | 0.09  | 0.23  | 0.4663102 | 1 |

|                                                  |       |       |           |   |
|--------------------------------------------------|-------|-------|-----------|---|
| acid secretion                                   | 0.09  | 0.23  | 0.4663102 | 1 |
| regulation of carbohydrate metabolic process     | 0.09  | 0.23  | 0.4663102 | 1 |
| fertilization (sensu Metazoa)                    | 0.09  | 0.23  | 0.4663102 | 1 |
| pteridine and derivative metabolic process       | 0.09  | 0.23  | 0.4663102 | 1 |
| sex determination                                | 0.09  | 0.23  | 0.4663102 | 1 |
| terpene metabolic process                        | 0.09  | 0.23  | 0.4663102 | 1 |
| sensory perception of temperature stimulus       | 0.09  | 0.23  | 0.4663102 | 1 |
| localization within membrane                     | 0.09  | 0.23  | 0.4663102 | 1 |
| coenzyme metabolic process                       | 1.54  | 0.93  | 0.4705845 | 1 |
| sex differentiation                              | 0.6   | 0.93  | 0.5001345 | 1 |
| protein-DNA complex assembly                     | 0.6   | 0.93  | 0.5001345 | 1 |
| morphogenesis of a branching structure           | 0.6   | 0.93  | 0.5001345 | 1 |
| learning                                         | 0.6   | 0.93  | 0.5001345 | 1 |
| regulation of anatomical structure morphogenesis | 0.6   | 0.93  | 0.5001345 | 1 |
| lipid transport                                  | 0.86  | 0.46  | 0.5316294 | 1 |
| appendage morphogenesis                          | 0.86  | 0.46  | 0.5316294 | 1 |
| embryonic pattern specification                  | 0.86  | 0.46  | 0.5316294 | 1 |
| nucleotide metabolic process                     | 2.05  | 1.39  | 0.5331728 | 1 |
| lymphocyte activation                            | 2.22  | 1.62  | 0.5545998 | 1 |
| negative regulation of developmental process     | 0.86  | 1.16  | 0.5650768 | 1 |
| immune effector process                          | 0.86  | 1.16  | 0.5650768 | 1 |
| regulation of transport                          | 0.86  | 1.16  | 0.5650768 | 1 |
| regulation of cell activation                    | 0.86  | 1.16  | 0.5650768 | 1 |
| regulation of cellular metabolic process         | 18.91 | 20.19 | 0.5679732 | 1 |
| regulation of body size                          | 0.26  | 0     | 0.5681721 | 1 |
| negative regulation of coagulation               | 0.26  | 0     | 0.5681721 | 1 |
| nucleobase metabolic process                     | 0.26  | 0     | 0.5681721 | 1 |
| axis specification                               | 0.26  | 0     | 0.5681721 | 1 |
| alcohol biosynthetic process                     | 0.26  | 0     | 0.5681721 | 1 |
| regulation of defense response                   | 0.26  | 0     | 0.5681721 | 1 |
| gene silencing                                   | 0.26  | 0     | 0.5681721 | 1 |
| interaction with host                            | 0.26  | 0     | 0.5681721 | 1 |
| lactation                                        | 0.26  | 0     | 0.5681721 | 1 |
| negative regulation of metabolic process         | 4.19  | 3.48  | 0.5682617 | 1 |
| cell migration                                   | 4.28  | 3.48  | 0.5684334 | 1 |
| RNA metabolic process                            | 19.76 | 18.33 | 0.5685241 | 1 |

|                                                |       |       |           |   |
|------------------------------------------------|-------|-------|-----------|---|
| response to nutrient levels                    | 0.34  | 0     | 0.5792585 | 1 |
| vitamin biosynthetic process                   | 0.34  | 0     | 0.5792585 | 1 |
| oligosaccharide metabolic process              | 0.34  | 0     | 0.5792585 | 1 |
| cell wall catabolic process                    | 0.34  | 0     | 0.5792585 | 1 |
| immune response-regulating signal transduction | 0.34  | 0     | 0.5792585 | 1 |
| secretory pathway                              | 2.31  | 2.78  | 0.5856398 | 1 |
| negative regulation of cellular process        | 11.46 | 10.44 | 0.5928768 | 1 |
| chromosome organization and biogenesis         | 2.74  | 2.09  | 0.5930421 | 1 |
| peptide transport                              | 0.26  | 0.46  | 0.6157702 | 1 |
| regulation of muscle contraction               | 0.26  | 0.46  | 0.6157702 | 1 |
| vacuole organization and biogenesis            | 0.26  | 0.46  | 0.6157702 | 1 |
| wound healing                                  | 1.37  | 0.93  | 0.6163635 | 1 |
| regulation of cell proliferation               | 5.22  | 5.8   | 0.6196558 | 1 |
| regulation of cell cycle                       | 5.39  | 6.03  | 0.6236839 | 1 |
| plasma membrane organization and biogenesis    | 0.34  | 0.46  | 0.6632268 | 1 |
| xenobiotic metabolic process                   | 0.34  | 0.46  | 0.6632268 | 1 |
| nitrogen compound catabolic process            | 0.34  | 0.46  | 0.6632268 | 1 |
| myeloid leukocyte activation                   | 0.34  | 0.46  | 0.6632268 | 1 |
| carboxylic acid metabolic process              | 3.85  | 4.41  | 0.6661591 | 1 |
| embryonic morphogenesis                        | 1.8   | 1.39  | 0.667289  | 1 |
| cell ion homeostasis                           | 1.8   | 1.39  | 0.667289  | 1 |
| fat cell differentiation                       | 0.51  | 0.23  | 0.6820303 | 1 |
| determination of symmetry                      | 0.51  | 0.23  | 0.6820303 | 1 |
| carbohydrate transport                         | 0.51  | 0.23  | 0.6820303 | 1 |
| cell cycle phase                               | 2.4   | 1.86  | 0.7038767 | 1 |
| organic acid biosynthetic process              | 0.51  | 0.7   | 0.7090337 | 1 |
| response to virus                              | 0.6   | 0.7   | 0.7343629 | 1 |
| regulation of neurological process             | 0.6   | 0.7   | 0.7343629 | 1 |
| regulation of cell organization and biogenesis | 0.77  | 0.46  | 0.7372031 | 1 |
| innate immune response                         | 0.77  | 0.93  | 0.7568814 | 1 |
| negative regulation of enzyme activity         | 0.94  | 0.7   | 0.7705156 | 1 |
| regulation of hydrolase activity               | 0.94  | 1.16  | 0.7772335 | 1 |
| tube morphogenesis                             | 1.03  | 1.16  | 0.7872186 | 1 |
| macromolecule biosynthetic process             | 5.39  | 4.87  | 0.800563  | 1 |
| anatomical structure formation                 | 1.71  | 1.39  | 0.8244722 | 1 |
| homophilic cell adhesion                       | 1.63  | 1.39  | 0.8244781 | 1 |

|                                                       |       |       |           |   |
|-------------------------------------------------------|-------|-------|-----------|---|
| regulation of cell differentiation                    | 2.14  | 1.86  | 0.8441696 | 1 |
| electron transport                                    | 2.14  | 1.86  | 0.8441696 | 1 |
| regulation of protein metabolic process               | 2.22  | 2.32  | 0.8517048 | 1 |
| cellular carbohydrate metabolic process               | 3.08  | 3.25  | 0.8717725 | 1 |
| establishment of cellular localization                | 5.56  | 5.8   | 0.9026782 | 1 |
| protein transport                                     | 5.9   | 6.03  | 0.9055007 | 1 |
| peroxisome organization and biogenesis                | 0.17  | 0.23  | 1         | 1 |
| pregnancy                                             | 0.34  | 0.23  | 1         | 1 |
| sulfur utilization                                    | 0.09  | 0     | 1         | 1 |
| intercellular junction assembly and maintenance       | 0.17  | 0.23  | 1         | 1 |
| humoral immune response                               | 1.2   | 1.16  | 1         | 1 |
| energy derivation by oxidation of organic compounds   | 1.37  | 1.16  | 1         | 1 |
| muscle cell differentiation                           | 0.68  | 0.7   | 1         | 1 |
| DNA metabolic process                                 | 4.96  | 4.87  | 1         | 1 |
| regulation of helicase activity                       | 0.09  | 0     | 1         | 1 |
| neurotransmitter transport                            | 0.68  | 0.46  | 1         | 1 |
| regulation of lipid metabolic process                 | 0.09  | 0     | 1         | 1 |
| transcription                                         | 18.48 | 18.33 | 1         | 1 |
| pigment biosynthetic process                          | 0.09  | 0     | 1         | 1 |
| two-component signal transduction system (phosphorela | 0.17  | 0.23  | 1         | 1 |
| porphyrin metabolic process                           | 0.17  | 0.23  | 1         | 1 |
| detection of hormone stimulus                         | 0.09  | 0     | 1         | 1 |
| keratinocyte differentiation                          | 0.51  | 0.46  | 1         | 1 |
| behavioral fear response                              | 0.17  | 0.23  | 1         | 1 |
| polyol transport                                      | 0.09  | 0     | 1         | 1 |
| maternal behavior                                     | 0.17  | 0.23  | 1         | 1 |
| antigen processing and presentation via MHC class Ib  | 0.09  | 0     | 1         | 1 |
| alkene biosynthetic process                           | 0.17  | 0.23  | 1         | 1 |
| mating behavior                                       | 0.17  | 0     | 1         | 1 |
| mechanoreceptor differentiation                       | 0.26  | 0.23  | 1         | 1 |
| protein complex assembly                              | 2.74  | 2.55  | 1         | 1 |
| response to metal ion                                 | 0.09  | 0     | 1         | 1 |
| imprinting                                            | 0.09  | 0     | 1         | 1 |
| autophagic vacuole formation                          | 0.09  | 0     | 1         | 1 |
| male gamete generation                                | 1.28  | 1.16  | 1         | 1 |
| regulation of growth rate                             | 0.09  | 0     | 1         | 1 |

|                                                          |      |      |   |   |
|----------------------------------------------------------|------|------|---|---|
| menstrual cycle                                          | 0.17 | 0.23 | 1 | 1 |
| vesicle-mediated transport                               | 4.7  | 4.64 | 1 | 1 |
| membrane fusion                                          | 0.26 | 0.23 | 1 | 1 |
| carbohydrate catabolic process                           | 0.77 | 0.7  | 1 | 1 |
| positive regulation of developmental process             | 0.86 | 0.93 | 1 | 1 |
| protein-RNA complex assembly                             | 0.68 | 0.7  | 1 | 1 |
| behavioral response to pain                              | 0.09 | 0    | 1 | 1 |
| lymphocyte homeostasis                                   | 0.17 | 0    | 1 | 1 |
| indole and derivative metabolic process                  | 0.09 | 0    | 1 | 1 |
| startle response                                         | 0.09 | 0    | 1 | 1 |
| polyol metabolic process                                 | 0.17 | 0.23 | 1 | 1 |
| regulation of pH                                         | 0.26 | 0.23 | 1 | 1 |
| sperm motility                                           | 0.17 | 0.23 | 1 | 1 |
| nucleobase, nucleoside, nucleotide and nucleic acid tran | 0.43 | 0.23 | 1 | 1 |
| sulfation                                                | 0.17 | 0    | 1 | 1 |
| taxis                                                    | 1.28 | 1.16 | 1 | 1 |
| sensory perception of pain                               | 0.26 | 0.23 | 1 | 1 |
| endocrine system development                             | 0.09 | 0    | 1 | 1 |
| water homeostasis                                        | 0.09 | 0    | 1 | 1 |
| viral infectious cycle                                   | 0.43 | 0.23 | 1 | 1 |
| morphogenesis of an epithelium                           | 1.2  | 1.16 | 1 | 1 |
| antigen processing and presentation of exogenous antig   | 0.09 | 0    | 1 | 1 |
| regulation of response to biotic stimulus                | 0.09 | 0    | 1 | 1 |
| positive regulation of response to stimulus              | 0.09 | 0    | 1 | 1 |
| positive regulation of gene expression, epigenetic       | 0.09 | 0    | 1 | 1 |
| fluid transport                                          | 0.09 | 0    | 1 | 1 |
| detection of tumor cell                                  | 0.09 | 0    | 1 | 1 |
| immune response to tumor cell                            | 0.09 | 0    | 1 | 1 |
| nutrient import                                          | 0.09 | 0    | 1 | 1 |
| hydrogen transport                                       | 0.43 | 0.23 | 1 | 1 |
| positive regulation of multicellular organismal process  | 1.11 | 0.93 | 1 | 1 |
| positive regulation of cytokine production               | 0.09 | 0    | 1 | 1 |
| regulation of embryonic development                      | 0.17 | 0    | 1 | 1 |
| nucleoside salvage                                       | 0.17 | 0    | 1 | 1 |
| vasodilation                                             | 0.09 | 0    | 1 | 1 |
| regulation of cell redox homeostasis                     | 0.09 | 0    | 1 | 1 |

|                                                                  |      |      |   |   |
|------------------------------------------------------------------|------|------|---|---|
| maintenance of cellular localization                             | 0.09 | 0    | 1 | 1 |
| gas transport                                                    | 0.09 | 0    | 1 | 1 |
| response to axon injury                                          | 0.09 | 0    | 1 | 1 |
| methylation                                                      | 0.34 | 0.23 | 1 | 1 |
| regeneration                                                     | 0.09 | 0    | 1 | 1 |
| antigen processing and presentation of peptide or polysaccharide | 0.09 | 0    | 1 | 1 |
| generation of a signal involved in cell-cell signaling           | 1.11 | 1.16 | 1 | 1 |
| pigment cell differentiation                                     | 0.17 | 0    | 1 | 1 |
| cofactor catabolic process                                       | 0.26 | 0.23 | 1 | 1 |
| phenol metabolic process                                         | 0.51 | 0.46 | 1 | 1 |
| myeloid cell homeostasis                                         | 0.09 | 0    | 1 | 1 |
| organic acid transport                                           | 0.51 | 0.46 | 1 | 1 |
| organelle localization                                           | 0.26 | 0.23 | 1 | 1 |
| movement in environment of other organism during symbiosis       | 0.17 | 0    | 1 | 1 |
| regulation of organ size                                         | 0.09 | 0    | 1 | 1 |
| ethanol metabolic process                                        | 0.09 | 0    | 1 | 1 |
| vitamin transport                                                | 0.17 | 0    | 1 | 1 |
| regulation of biosynthetic process                               | 1.37 | 1.39 | 1 | 1 |
| aromatic compound catabolic process                              | 0.17 | 0.23 | 1 | 1 |
| purine salvage                                                   | 0.17 | 0    | 1 | 1 |
| hormone catabolic process                                        | 0.09 | 0    | 1 | 1 |
| negative regulation of gene expression, epigenetic               | 0.09 | 0    | 1 | 1 |
| positive regulation of locomotion                                | 0.17 | 0.23 | 1 | 1 |
| quinone cofactor metabolic process                               | 0.09 | 0    | 1 | 1 |
| suckling behavior                                                | 0.17 | 0    | 1 | 1 |
| cofactor transport                                               | 0.09 | 0    | 1 | 1 |
| ciliary or flagellar motility                                    | 0.17 | 0    | 1 | 1 |
| ribosome biogenesis and assembly                                 | 0.17 | 0.23 | 1 | 1 |
| cell-matrix adhesion                                             | 0.43 | 0.46 | 1 | 1 |
| amino acid derivative metabolic process                          | 0.77 | 0.7  | 1 | 1 |
| cell envelope organization and biogenesis                        | 0.17 | 0    | 1 | 1 |
| nucleotide-sugar metabolic process                               | 0.09 | 0    | 1 | 1 |
| memory                                                           | 0.17 | 0.23 | 1 | 1 |
| protein complex disassembly                                      | 0.09 | 0    | 1 | 1 |
| adaptive immune response                                         | 0.68 | 0.7  | 1 | 1 |
| modification of morphology or physiology of other organisms      | 0.09 | 0    | 1 | 1 |



|                                        |      |      |   |   |
|----------------------------------------|------|------|---|---|
| positive regulation of enzyme activity | 2.14 | 2.09 | 1 | 1 |
| nitric oxide biosynthetic process      | 0.17 | 0.23 | 1 | 1 |
| response to X-ray                      | 0.09 | 0    | 1 | 1 |
| cell glucose homeostasis               | 0.09 | 0    | 1 | 1 |

| Gene Ontology : biological process. Level: 6          | Percentage of genes with allele-specific expression | Percentage of genes without allele-specific expression | Unadjusted pvalue | Adjusted pvalueFDR |
|-------------------------------------------------------|-----------------------------------------------------|--------------------------------------------------------|-------------------|--------------------|
| protein modification                                  | 18.93                                               | 11.87                                                  | 0.001320007       | 1                  |
| sensory perception of smell                           | 1.02                                                | 3.03                                                   | 0.00867637        | 1                  |
| G-protein coupled receptor protein signaling pathway  | 6.93                                                | 10.86                                                  | 0.01683893        | 1                  |
| adult walking behavior                                | 0                                                   | 0.76                                                   | 0.01908822        | 1                  |
| phosphorylation                                       | 8.86                                                | 5.3                                                    | 0.02899869        | 1                  |
| embryonic development (sensu Vertebrata)              | 1.11                                                | 0                                                      | 0.04382327        | 1                  |
| visual behavior                                       | 0.09                                                | 0.76                                                   | 0.06110558        | 1                  |
| visual perception                                     | 1.66                                                | 3.28                                                   | 0.06460708        | 1                  |
| anterior/posterior pattern formation                  | 0.92                                                | 0                                                      | 0.0709744         | 1                  |
| DNA strand elongation                                 | 0                                                   | 0.51                                                   | 0.0715566         | 1                  |
| negative regulation of bone remodeling                | 0                                                   | 0.51                                                   | 0.0715566         | 1                  |
| regulation of phospholipase A2 activity               | 0                                                   | 0.51                                                   | 0.0715566         | 1                  |
| cellular lipid catabolic process                      | 0.28                                                | 1.01                                                   | 0.08760815        | 1                  |
| cellular polysaccharide metabolic process             | 0.28                                                | 1.01                                                   | 0.08760815        | 1                  |
| amine biosynthetic process                            | 0.65                                                | 1.52                                                   | 0.122405          | 1                  |
| smoothened signaling pathway                          | 0.18                                                | 0.76                                                   | 0.12275           | 1                  |
| energy reserve metabolic process                      | 0.18                                                | 0.76                                                   | 0.12275           | 1                  |
| regulation of kinase activity                         | 2.12                                                | 3.54                                                   | 0.1336111         | 1                  |
| protein oligomerization                               | 0.46                                                | 1.26                                                   | 0.1436778         | 1                  |
| defense response to bacterium                         | 0.46                                                | 1.26                                                   | 0.1436778         | 1                  |
| sensory organ development                             | 0.83                                                | 1.77                                                   | 0.1531851         | 1                  |
| DNA recombination                                     | 0.83                                                | 1.77                                                   | 0.1531851         | 1                  |
| regulation of cell size                               | 1.94                                                | 0.76                                                   | 0.1609293         | 1                  |
| protein catabolic process                             | 1.94                                                | 3.28                                                   | 0.1678934         | 1                  |
| modification-dependent macromolecule catabolic proces | 1.39                                                | 2.53                                                   | 0.1689792         | 1                  |
| detection of light stimulus                           | 0.09                                                | 0.51                                                   | 0.1764934         | 1                  |
| defense response to fungus                            | 0.09                                                | 0.51                                                   | 0.1764934         | 1                  |
| neuron adhesion                                       | 0.09                                                | 0.51                                                   | 0.1764934         | 1                  |
| vitamin A metabolic process                           | 0.09                                                | 0.51                                                   | 0.1764934         | 1                  |
| synaptic vesicle transport                            | 0.28                                                | 0.76                                                   | 0.1980979         | 1                  |
| positive regulation of immune system process          | 1.02                                                | 0.25                                                   | 0.1995551         | 1                  |
| exocytosis                                            | 1.11                                                | 2.02                                                   | 0.2034832         | 1                  |
| synaptic transmission                                 | 4.16                                                | 5.81                                                   | 0.2062397         | 1                  |
| kidney development                                    | 0.74                                                | 1.52                                                   | 0.2214429         | 1                  |
| Wnt receptor signaling pathway                        | 1.39                                                | 2.27                                                   | 0.2470893         | 1                  |

|                                                       |      |      |           |   |
|-------------------------------------------------------|------|------|-----------|---|
| positive regulation of cell differentiation           | 0.46 | 1.01 | 0.2598048 | 1 |
| Notch signaling pathway                               | 0.46 | 1.01 | 0.2598048 | 1 |
| cyclic nucleotide metabolic process                   | 0.46 | 1.01 | 0.2598048 | 1 |
| regulation of cell migration                          | 0.46 | 1.01 | 0.2598048 | 1 |
| glutamate signaling pathway                           | 0.46 | 1.01 | 0.2598048 | 1 |
| biopolymer glycosylation                              | 1.94 | 1.01 | 0.261897  | 1 |
| mRNA metabolic process                                | 2.03 | 1.01 | 0.2631478 | 1 |
| carbohydrate mediated signaling                       | 0    | 0.25 | 0.2677485 | 1 |
| locomotor rhythm                                      | 0    | 0.25 | 0.2677485 | 1 |
| positive regulation of bone remodeling                | 0    | 0.25 | 0.2677485 | 1 |
| S-adenosylmethionine metabolic process                | 0    | 0.25 | 0.2677485 | 1 |
| protein insertion into membrane                       | 0    | 0.25 | 0.2677485 | 1 |
| baroreceptor feedback regulation of blood pressure    | 0    | 0.25 | 0.2677485 | 1 |
| circadian sleep/wake cycle                            | 0    | 0.25 | 0.2677485 | 1 |
| negative regulation of carbohydrate metabolic process | 0    | 0.25 | 0.2677485 | 1 |
| regulation of nitric oxide biosynthetic process       | 0    | 0.25 | 0.2677485 | 1 |
| peptide modification                                  | 0    | 0.25 | 0.2677485 | 1 |
| positive regulation of catabolic process              | 0    | 0.25 | 0.2677485 | 1 |
| polysaccharide catabolic process                      | 0    | 0.25 | 0.2677485 | 1 |
| response to cocaine                                   | 0    | 0.25 | 0.2677485 | 1 |
| carboxylic acid catabolic process                     | 0    | 0.25 | 0.2677485 | 1 |
| regulation of blood pressure by hormones              | 0    | 0.25 | 0.2677485 | 1 |
| superoxide release                                    | 0    | 0.25 | 0.2677485 | 1 |
| behavioral response to ethanol                        | 0    | 0.25 | 0.2677485 | 1 |
| amino acid derivative catabolic process               | 0    | 0.25 | 0.2677485 | 1 |
| sensory perception of taste                           | 0    | 0.25 | 0.2677485 | 1 |
| regulation of cellular catabolic process              | 0    | 0.25 | 0.2677485 | 1 |
| phospholipid scrambling                               | 0    | 0.25 | 0.2677485 | 1 |
| response to reactive oxygen species                   | 0    | 0.25 | 0.2677485 | 1 |
| response to morphine                                  | 0    | 0.25 | 0.2677485 | 1 |
| muscle cell development                               | 0    | 0.25 | 0.2677485 | 1 |
| centrosome organization and biogenesis                | 0    | 0.25 | 0.2677485 | 1 |
| antibiotic biosynthetic process                       | 0    | 0.25 | 0.2677485 | 1 |
| detection of bacterium                                | 0    | 0.25 | 0.2677485 | 1 |
| negative regulation of catabolic process              | 0    | 0.25 | 0.2677485 | 1 |
| DNA geometric change                                  | 0    | 0.25 | 0.2677485 | 1 |

|                                                   |      |      |           |   |
|---------------------------------------------------|------|------|-----------|---|
| glutathione metabolic process                     | 0    | 0.25 | 0.2677485 | 1 |
| DNA ligation                                      | 0    | 0.25 | 0.2677485 | 1 |
| regulation of vasoconstriction                    | 0    | 0.25 | 0.2677485 | 1 |
| nitric oxide mediated signal transduction         | 0    | 0.25 | 0.2677485 | 1 |
| RNA processing                                    | 2.95 | 1.77 | 0.2713158 | 1 |
| substrate-bound cell migration                    | 0.18 | 0.51 | 0.2918811 | 1 |
| cell fate determination                           | 0.18 | 0.51 | 0.2918811 | 1 |
| cell-cell signaling during cell fate commitment   | 0.18 | 0.51 | 0.2918811 | 1 |
| glycerolipid metabolic process                    | 0.18 | 0.51 | 0.2918811 | 1 |
| mesenchymal cell development                      | 0.18 | 0.51 | 0.2918811 | 1 |
| biopolymer biosynthetic process                   | 0.18 | 0.51 | 0.2918811 | 1 |
| peptidoglycan metabolic process                   | 0.18 | 0.51 | 0.2918811 | 1 |
| neutral lipid metabolic process                   | 0.18 | 0.51 | 0.2918811 | 1 |
| female sex differentiation                        | 0.18 | 0.51 | 0.2918811 | 1 |
| monosaccharide metabolic process                  | 1.57 | 0.76 | 0.3124353 | 1 |
| skeletal development                              | 2.95 | 4.04 | 0.3202762 | 1 |
| central nervous system development                | 3.05 | 4.04 | 0.3297796 | 1 |
| oxidoreduction coenzyme metabolic process         | 0.55 | 0    | 0.351682  | 1 |
| membrane lipid metabolic process                  | 1.39 | 2.02 | 0.3538307 | 1 |
| anion transport                                   | 1.39 | 2.02 | 0.3538307 | 1 |
| positive regulation of cellular metabolic process | 4.25 | 3.03 | 0.3638177 | 1 |
| regulation of immune response                     | 1.11 | 0.51 | 0.3761687 | 1 |
| blood coagulation                                 | 1.11 | 0.51 | 0.3761687 | 1 |
| main pathways of carbohydrate metabolic process   | 1.2  | 0.51 | 0.379194  | 1 |
| coenzyme biosynthetic process                     | 1.2  | 0.51 | 0.379194  | 1 |
| negative regulation of signal transduction        | 1.2  | 0.51 | 0.379194  | 1 |
| aminoglycan metabolic process                     | 0.37 | 0.76 | 0.3932599 | 1 |
| cell death                                        | 7.2  | 5.81 | 0.4150825 | 1 |
| glycoprotein metabolic process                    | 2.31 | 1.52 | 0.4168532 | 1 |
| endocytosis                                       | 2.31 | 1.52 | 0.4168532 | 1 |
| tissue development                                | 3.14 | 4.04 | 0.4171678 | 1 |
| sensory perception of sound                       | 1.39 | 0.76 | 0.4290147 | 1 |
| monocarboxylic acid metabolic process             | 2.12 | 2.78 | 0.438683  | 1 |
| negative regulation of transferase activity       | 0.46 | 0.76 | 0.4480905 | 1 |
| regulation of transmission of nerve impulse       | 0.46 | 0.76 | 0.4480905 | 1 |
| establishment and/or maintenance of cell polarity | 0.46 | 0.76 | 0.4480905 | 1 |

|                                                       |      |      |           |   |
|-------------------------------------------------------|------|------|-----------|---|
| negative regulation of cellular metabolic process     | 4.25 | 3.28 | 0.4556657 | 1 |
| intracellular receptor-mediated signaling pathway     | 0.74 | 0.25 | 0.4586838 | 1 |
| regulation of ion transport                           | 0.09 | 0.25 | 0.4639404 | 1 |
| thermoception                                         | 0.09 | 0.25 | 0.4639404 | 1 |
| pteridine and derivative biosynthetic process         | 0.09 | 0.25 | 0.4639404 | 1 |
| peptide secretion                                     | 0.09 | 0.25 | 0.4639404 | 1 |
| negative regulation of cell motility                  | 0.09 | 0.25 | 0.4639404 | 1 |
| regulation of smooth muscle contraction               | 0.09 | 0.25 | 0.4639404 | 1 |
| positive regulation of heart contraction              | 0.09 | 0.25 | 0.4639404 | 1 |
| molybdopterin cofactor metabolic process              | 0.09 | 0.25 | 0.4639404 | 1 |
| positive regulation of carbohydrate metabolic process | 0.09 | 0.25 | 0.4639404 | 1 |
| ovulation                                             | 0.09 | 0.25 | 0.4639404 | 1 |
| regulation of nitric-oxide synthase activity          | 0.09 | 0.25 | 0.4639404 | 1 |
| natural killer cell activation                        | 0.09 | 0.25 | 0.4639404 | 1 |
| porphyrin catabolic process                           | 0.09 | 0.25 | 0.4639404 | 1 |
| leukocyte activation during immune response           | 0.09 | 0.25 | 0.4639404 | 1 |
| arachidonic acid secretion                            | 0.09 | 0.25 | 0.4639404 | 1 |
| plasma membrane repair                                | 0.09 | 0.25 | 0.4639404 | 1 |
| oligopeptide transport                                | 0.09 | 0.25 | 0.4639404 | 1 |
| intestinal absorption                                 | 0.09 | 0.25 | 0.4639404 | 1 |
| morphogenesis of an epithelial sheet                  | 0.09 | 0.25 | 0.4639404 | 1 |
| lipoprotein metabolic process                         | 0.55 | 1.01 | 0.4718883 | 1 |
| acute inflammatory response                           | 0.55 | 1.01 | 0.4718883 | 1 |
| positive regulation of transferase activity           | 1.48 | 2.02 | 0.4873266 | 1 |
| branching morphogenesis of a tube                     | 0.65 | 1.01 | 0.4982371 | 1 |
| positive regulation of biosynthetic process           | 0.65 | 1.01 | 0.4982371 | 1 |
| regulation of cell morphogenesis                      | 0.65 | 1.01 | 0.4982371 | 1 |
| neurogenesis                                          | 5.26 | 4.29 | 0.5025364 | 1 |
| actin filament-based process                          | 3.42 | 2.53 | 0.5030137 | 1 |
| cell projection morphogenesis                         | 3.42 | 2.53 | 0.5030137 | 1 |
| limb morphogenesis                                    | 0.92 | 0.51 | 0.5323865 | 1 |
| embryonic appendage morphogenesis                     | 0.92 | 0.51 | 0.5323865 | 1 |
| microtubule-based process                             | 2.22 | 1.52 | 0.5325448 | 1 |
| cytokine metabolic process                            | 0.92 | 1.26 | 0.56311   | 1 |
| regulation of fat cell differentiation                | 0.28 | 0    | 0.5688295 | 1 |
| response to UV                                        | 0.28 | 0    | 0.5688295 | 1 |

|                                                         |      |       |           |   |
|---------------------------------------------------------|------|-------|-----------|---|
| receptor metabolic process                              | 0.28 | 0     | 0.5688295 | 1 |
| cardiac inotropy                                        | 0.28 | 0     | 0.5688295 | 1 |
| response to nutrient                                    | 0.28 | 0     | 0.5688295 | 1 |
| cytokine secretion                                      | 0.28 | 0     | 0.5688295 | 1 |
| cortical cytoskeleton organization and biogenesis       | 0.28 | 0     | 0.5688295 | 1 |
| acetyl-CoA metabolic process                            | 0.28 | 0     | 0.5688295 | 1 |
| leukocyte adhesion                                      | 0.28 | 0     | 0.5688295 | 1 |
| RNA modification                                        | 0.28 | 0     | 0.5688295 | 1 |
| positive regulation of cell organization and biogenesis | 0.28 | 0     | 0.5688295 | 1 |
| nucleobase biosynthetic process                         | 0.28 | 0     | 0.5688295 | 1 |
| nucleoside monophosphate metabolic process              | 0.28 | 0     | 0.5688295 | 1 |
| regulation of inflammatory response                     | 0.28 | 0     | 0.5688295 | 1 |
| germ cell migration                                     | 0.28 | 0     | 0.5688295 | 1 |
| negative regulation of cyclase activity                 | 0.37 | 0     | 0.5789563 | 1 |
| negative regulation of lyase activity                   | 0.37 | 0     | 0.5789563 | 1 |
| immune response-regulating cell surface receptor signal | 0.37 | 0     | 0.5789563 | 1 |
| regulation of protein secretion                         | 0.37 | 0     | 0.5789563 | 1 |
| positive regulation of secretion                        | 0.37 | 0     | 0.5789563 | 1 |
| water-soluble vitamin biosynthetic process              | 0.37 | 0     | 0.5789563 | 1 |
| cellular respiration                                    | 0.37 | 0     | 0.5789563 | 1 |
| protein import                                          | 1.11 | 1.52  | 0.5923102 | 1 |
| vasculature development                                 | 2.86 | 2.27  | 0.592668  | 1 |
| heart development                                       | 1.2  | 1.52  | 0.6082916 | 1 |
| cellular morphogenesis during differentiation           | 3.23 | 2.53  | 0.6083547 | 1 |
| amino acid derivative biosynthetic process              | 0.28 | 0.51  | 0.614638  | 1 |
| proteoglycan metabolic process                          | 0.28 | 0.51  | 0.614638  | 1 |
| negative regulation of cell organization and biogenesis | 0.28 | 0.51  | 0.614638  | 1 |
| regulation of epithelial cell proliferation             | 0.28 | 0.51  | 0.614638  | 1 |
| lysosome organization and biogenesis                    | 0.28 | 0.51  | 0.614638  | 1 |
| protein depolymerization                                | 0.28 | 0.51  | 0.614638  | 1 |
| cytokine and chemokine mediated signaling pathway       | 0.28 | 0.51  | 0.614638  | 1 |
| protein folding                                         | 1.48 | 1.01  | 0.6165122 | 1 |
| DNA replication                                         | 1.48 | 1.77  | 0.6420987 | 1 |
| small GTPase mediated signal transduction               | 4.25 | 3.54  | 0.6554219 | 1 |
| regulation of nucleobase, nucleoside, nucleotide and nu | 19.3 | 20.45 | 0.6572536 | 1 |
| regulation of action potential                          | 0.37 | 0.51  | 0.661488  | 1 |

|                                                          |      |      |           |   |
|----------------------------------------------------------|------|------|-----------|---|
| amine catabolic process                                  | 0.37 | 0.51 | 0.661488  | 1 |
| gastrulation                                             | 0.37 | 0.51 | 0.661488  | 1 |
| protein kinase cascade                                   | 4.52 | 3.79 | 0.6650541 | 1 |
| M phase                                                  | 1.94 | 1.52 | 0.6676904 | 1 |
| lipid biosynthetic process                               | 1.85 | 2.27 | 0.6717916 | 1 |
| segmentation                                             | 0.55 | 0.25 | 0.6822859 | 1 |
| determination of bilateral symmetry                      | 0.55 | 0.25 | 0.6822859 | 1 |
| positive regulation of transport                         | 0.55 | 0.25 | 0.6822859 | 1 |
| DNA packaging                                            | 2.22 | 1.77 | 0.6859411 | 1 |
| germ cell development                                    | 0.65 | 0.25 | 0.6897683 | 1 |
| group transfer coenzyme metabolic process                | 0.65 | 0.25 | 0.6897683 | 1 |
| epithelial cell differentiation                          | 0.65 | 0.25 | 0.6897683 | 1 |
| cation transport                                         | 5.54 | 6.06 | 0.7042588 | 1 |
| carboxylic acid biosynthetic process                     | 0.55 | 0.76 | 0.7079658 | 1 |
| cellular protein complex assembly                        | 0.55 | 0.76 | 0.7079658 | 1 |
| development of primary sexual characteristics            | 0.55 | 0.76 | 0.7079658 | 1 |
| regulation of progression through cell cycle             | 5.72 | 6.31 | 0.7081859 | 1 |
| intracellular transport                                  | 5.82 | 6.31 | 0.7107259 | 1 |
| muscle development                                       | 2.49 | 2.78 | 0.7144068 | 1 |
| positive regulation of cell proliferation                | 2.49 | 2.78 | 0.7144068 | 1 |
| chromosome organization and biogenesis (sensu Eukaryota) | 2.77 | 2.27 | 0.7152497 | 1 |
| positive regulation of hydrolase activity                | 0.65 | 0.76 | 0.7327987 | 1 |
| negative regulation of protein metabolic process         | 0.65 | 0.76 | 0.7327987 | 1 |
| ribonucleotide metabolic process                         | 0.83 | 0.51 | 0.7372247 | 1 |
| biogenic amine metabolic process                         | 0.83 | 0.51 | 0.7372247 | 1 |
| leukocyte mediated immunity                              | 0.74 | 1.01 | 0.7434302 | 1 |
| cell maturation                                          | 0.83 | 1.01 | 0.7558127 | 1 |
| antimicrobial humoral response                           | 0.83 | 1.01 | 0.7558127 | 1 |
| regulation of lymphocyte activation                      | 0.83 | 1.01 | 0.7558127 | 1 |
| negative regulation of cell differentiation              | 0.83 | 1.01 | 0.7558127 | 1 |
| carbohydrate biosynthetic process                        | 1.02 | 1.26 | 0.7765899 | 1 |
| regulated secretory pathway                              | 1.02 | 1.26 | 0.7765899 | 1 |
| steroid metabolic process                                | 1.29 | 1.01 | 0.7935596 | 1 |
| T cell activation                                        | 1.57 | 1.26 | 0.8107554 | 1 |
| dephosphorylation                                        | 1.75 | 2.02 | 0.8263799 | 1 |
| amino acid metabolic process                             | 1.85 | 2.02 | 0.8305251 | 1 |

|                                                       |       |       |           |   |
|-------------------------------------------------------|-------|-------|-----------|---|
| organ morphogenesis                                   | 4.34  | 4.55  | 0.8862671 | 1 |
| RNA biosynthetic process                              | 18.47 | 18.69 | 0.9397939 | 1 |
| synaptogenesis                                        | 0.28  | 0.25  | 1         | 1 |
| B cell activation                                     | 1.11  | 1.01  | 1         | 1 |
| mast cell activation                                  | 0.18  | 0.25  | 1         | 1 |
| positive regulation of cyclase activity               | 0.09  | 0     | 1         | 1 |
| benzene and derivative metabolic process              | 0.09  | 0     | 1         | 1 |
| regulation of pigment cell differentiation            | 0.09  | 0     | 1         | 1 |
| hemoglobin metabolic process                          | 0.18  | 0     | 1         | 1 |
| negative regulation of helicase activity              | 0.09  | 0     | 1         | 1 |
| deoxyribonucleoside metabolic process                 | 0.09  | 0     | 1         | 1 |
| uroporphyrinogen III metabolic process                | 0.09  | 0     | 1         | 1 |
| ameboidal cell migration                              | 0.18  | 0     | 1         | 1 |
| modification of host morphology or physiology         | 0.09  | 0     | 1         | 1 |
| immune system development                             | 2.77  | 2.78  | 1         | 1 |
| positive regulation of protein metabolic process      | 1.02  | 1.01  | 1         | 1 |
| oogenesis                                             | 0.18  | 0.25  | 1         | 1 |
| amino sugar metabolic process                         | 0.18  | 0     | 1         | 1 |
| regulation of smooth muscle cell proliferation        | 0.09  | 0     | 1         | 1 |
| negative regulation of heart contraction              | 0.09  | 0     | 1         | 1 |
| morphogenesis of a polarized epithelium               | 0.09  | 0     | 1         | 1 |
| spermatogenesis                                       | 1.39  | 1.26  | 1         | 1 |
| stress-activated protein kinase signaling pathway     | 0.55  | 0.51  | 1         | 1 |
| vitamin D metabolic process                           | 0.09  | 0     | 1         | 1 |
| purine nucleoside metabolic process                   | 0.18  | 0     | 1         | 1 |
| negative regulation of neurological process           | 0.09  | 0     | 1         | 1 |
| DNA catabolic process                                 | 0.18  | 0     | 1         | 1 |
| regulation of muscle cell differentiation             | 0.09  | 0     | 1         | 1 |
| embryonic axis specification                          | 0.09  | 0     | 1         | 1 |
| DNA damage response, signal transduction by p53 class | 0.18  | 0     | 1         | 1 |
| vesicle fusion                                        | 0.18  | 0.25  | 1         | 1 |
| cellular carbohydrate catabolic process               | 0.83  | 0.76  | 1         | 1 |
| formation of immunological synapse                    | 0.09  | 0     | 1         | 1 |
| cell fate specification                               | 0.18  | 0     | 1         | 1 |
| DNA repair                                            | 1.94  | 1.77  | 1         | 1 |
| pyrimidine base metabolic process                     | 0.18  | 0     | 1         | 1 |



|                                                                    |      |      |   |   |
|--------------------------------------------------------------------|------|------|---|---|
| pyrimidine nucleoside metabolic process                            | 0.09 | 0    | 1 | 1 |
| translation                                                        | 2.49 | 2.53 | 1 | 1 |
| movement in host environment                                       | 0.18 | 0    | 1 | 1 |
| melanocyte differentiation                                         | 0.18 | 0    | 1 | 1 |
| positive regulation of lipid metabolic process                     | 0.09 | 0    | 1 | 1 |
| nucleotide-sugar biosynthetic process                              | 0.09 | 0    | 1 | 1 |
| nucleic acid transport                                             | 0.37 | 0.25 | 1 | 1 |
| negative regulation of secretion                                   | 0.18 | 0    | 1 | 1 |
| lipid raft organization and biogenesis                             | 0.18 | 0    | 1 | 1 |
| dorsal/ventral pattern formation                                   | 0.28 | 0.25 | 1 | 1 |
| mitochondrial membrane organization and biogenesis                 | 0.09 | 0    | 1 | 1 |
| phosphoenolpyruvate-dependent sugar phosphotransfer                | 0.09 | 0    | 1 | 1 |
| MHC class II biosynthetic process                                  | 0.18 | 0    | 1 | 1 |
| proximal/distal pattern formation                                  | 0.09 | 0    | 1 | 1 |
| positive regulation of lyase activity                              | 0.09 | 0    | 1 | 1 |
| negative regulation of defense response                            | 0.18 | 0    | 1 | 1 |
| nucleotide-sugar transport                                         | 0.09 | 0    | 1 | 1 |
| regulation of cellular biosynthetic process                        | 1.39 | 1.26 | 1 | 1 |
| viral genome replication                                           | 0.28 | 0.25 | 1 | 1 |
| positive regulation of cell motility                               | 0.18 | 0.25 | 1 | 1 |
| adaptive immune response (sensu Gnathostomata)                     | 0.74 | 0.76 | 1 | 1 |
| disruption of cells of other organism during symbiotic interaction | 0.09 | 0    | 1 | 1 |
| detection of fungus                                                | 0.09 | 0    | 1 | 1 |
| response to mercury ion                                            | 0.09 | 0    | 1 | 1 |
| catecholamine transport                                            | 0.09 | 0    | 1 | 1 |
| long-term memory                                                   | 0.09 | 0    | 1 | 1 |
| nucleus localization                                               | 0.09 | 0    | 1 | 1 |
| ER-nuclear signaling pathway                                       | 0.28 | 0.25 | 1 | 1 |
| glycerol metabolic process                                         | 0.18 | 0.25 | 1 | 1 |
| rRNA metabolic process                                             | 0.28 | 0.25 | 1 | 1 |
| mitochondrial genome maintenance                                   | 0.09 | 0    | 1 | 1 |
| endodermal cell fate commitment                                    | 0.09 | 0    | 1 | 1 |
| morphogenesis of embryonic epithelium                              | 0.55 | 0.51 | 1 | 1 |
| nucleoside catabolic process                                       | 0.09 | 0    | 1 | 1 |
| fatty acid transport                                               | 0.09 | 0    | 1 | 1 |
| dicarboxylic acid metabolic process                                | 0.18 | 0    | 1 | 1 |

|                                                        |      |      |   |   |
|--------------------------------------------------------|------|------|---|---|
| respiratory tube development                           | 0.55 | 0.51 | 1 | 1 |
| hormone secretion                                      | 0.28 | 0.25 | 1 | 1 |
| male pronucleus formation                              | 0.09 | 0    | 1 | 1 |
| production of molecular mediator of immune response    | 0.18 | 0.25 | 1 | 1 |
| lipid modification                                     | 0.28 | 0.25 | 1 | 1 |
| nucleoside triphosphate metabolic process              | 0.46 | 0.51 | 1 | 1 |
| neutrophil homeostasis                                 | 0.09 | 0    | 1 | 1 |
| T cell homeostasis                                     | 0.18 | 0    | 1 | 1 |
| defense response to virus                              | 0.18 | 0    | 1 | 1 |
| biopolymer methylation                                 | 0.18 | 0    | 1 | 1 |
| purine base metabolic process                          | 0.09 | 0    | 1 | 1 |
| second-messenger-mediated signaling                    | 2.95 | 2.78 | 1 | 1 |
| posttranscriptional gene silencing                     | 0.09 | 0    | 1 | 1 |
| dopamine transport                                     | 0.09 | 0    | 1 | 1 |
| establishment of organelle localization                | 0.28 | 0.25 | 1 | 1 |
| maintenance of DNA repeat elements                     | 0.09 | 0    | 1 | 1 |
| cytoskeletal anchoring                                 | 0.09 | 0    | 1 | 1 |
| ribonucleoside metabolic process                       | 0.18 | 0    | 1 | 1 |
| endothelial cell migration                             | 0.09 | 0    | 1 | 1 |
| thiamin and derivative metabolic process               | 0.09 | 0    | 1 | 1 |
| RNA catabolic process                                  | 0.18 | 0    | 1 | 1 |
| entry into other organism during symbiotic interaction | 0.18 | 0    | 1 | 1 |
| nucleobase catabolic process                           | 0.09 | 0    | 1 | 1 |
| protein polymerization                                 | 0.55 | 0.51 | 1 | 1 |
| negative regulation of biosynthetic process            | 0.46 | 0.25 | 1 | 1 |
| water transport                                        | 0.09 | 0    | 1 | 1 |
| regulation of fibroblast proliferation                 | 0.18 | 0.25 | 1 | 1 |
| regulation of vasodilation                             | 0.09 | 0    | 1 | 1 |
| peripheral nervous system development                  | 0.28 | 0.25 | 1 | 1 |
| anion homeostasis                                      | 0.09 | 0    | 1 | 1 |
| embryonic organ development                            | 0.28 | 0.25 | 1 | 1 |
| choline transport                                      | 0.09 | 0    | 1 | 1 |
| lymphocyte proliferation                               | 0.83 | 0.76 | 1 | 1 |
| regulation of GTPase activity                          | 0.46 | 0.51 | 1 | 1 |
| regulation of response to tumor cell                   | 0.09 | 0    | 1 | 1 |
| negative regulation of transport                       | 0.28 | 0.25 | 1 | 1 |

|                                                           |      |      |   |   |
|-----------------------------------------------------------|------|------|---|---|
| chemotaxis                                                | 1.39 | 1.26 | 1 | 1 |
| tRNA metabolic process                                    | 0.46 | 0.25 | 1 | 1 |
| regulation of sensory perception                          | 0.09 | 0    | 1 | 1 |
| regulation of antiviral response                          | 0.09 | 0    | 1 | 1 |
| neural crest cell differentiation                         | 0.18 | 0    | 1 | 1 |
| hormone-mediated signaling                                | 0.09 | 0    | 1 | 1 |
| associative learning                                      | 0.18 | 0.25 | 1 | 1 |
| isoprenoid metabolic process                              | 0.18 | 0.25 | 1 | 1 |
| neural tube development                                   | 0.37 | 0.25 | 1 | 1 |
| regulation of protein stability                           | 0.18 | 0    | 1 | 1 |
| nuclear body organization and biogenesis                  | 0.09 | 0    | 1 | 1 |
| positive regulation of defense response                   | 0.09 | 0    | 1 | 1 |
| regulation of phosphorus metabolic process                | 0.65 | 0.51 | 1 | 1 |
| protein maturation                                        | 0.09 | 0    | 1 | 1 |
| initiation of viral infection                             | 0.18 | 0    | 1 | 1 |
| intercellular junction assembly                           | 0.18 | 0.25 | 1 | 1 |
| positive regulation of signal transduction                | 1.39 | 1.26 | 1 | 1 |
| monoamine transport                                       | 0.09 | 0    | 1 | 1 |
| chromosome condensation                                   | 0.18 | 0.25 | 1 | 1 |
| pH reduction                                              | 0.09 | 0    | 1 | 1 |
| gland development                                         | 0.28 | 0.25 | 1 | 1 |
| male sex differentiation                                  | 0.28 | 0.25 | 1 | 1 |
| indole derivative metabolic process                       | 0.09 | 0    | 1 | 1 |
| oxygen transport                                          | 0.09 | 0    | 1 | 1 |
| sterol transport                                          | 0.18 | 0    | 1 | 1 |
| pancreas development                                      | 0.09 | 0    | 1 | 1 |
| negative regulation of cell proliferation                 | 2.86 | 2.78 | 1 | 1 |
| enzyme linked receptor protein signaling pathway          | 3.69 | 3.79 | 1 | 1 |
| carboxylic acid transport                                 | 0.55 | 0.51 | 1 | 1 |
| nucleoside diphosphate metabolic process                  | 0.09 | 0    | 1 | 1 |
| brown fat cell differentiation                            | 0.09 | 0    | 1 | 1 |
| heme metabolic process                                    | 0.09 | 0    | 1 | 1 |
| modification of structure of other organism during symbic | 0.09 | 0    | 1 | 1 |
| smooth muscle cell differentiation                        | 0.18 | 0    | 1 | 1 |
| vitamin B6 metabolic process                              | 0.09 | 0    | 1 | 1 |
| cation homeostasis                                        | 1.75 | 1.52 | 1 | 1 |

|                                                            |      |      |   |   |
|------------------------------------------------------------|------|------|---|---|
| cobalamin transport                                        | 0.09 | 0    | 1 | 1 |
| purine nucleotide metabolic process                        | 0.65 | 0.51 | 1 | 1 |
| macrophage activation                                      | 0.28 | 0.25 | 1 | 1 |
| intermediate filament-based process                        | 0.09 | 0    | 1 | 1 |
| gut development                                            | 0.28 | 0.25 | 1 | 1 |
| cellular protein complex disassembly                       | 0.09 | 0    | 1 | 1 |
| nucleotide catabolic process                               | 0.09 | 0    | 1 | 1 |
| negative regulation of organ size                          | 0.09 | 0    | 1 | 1 |
| sulfate assimilation                                       | 0.09 | 0    | 1 | 1 |
| negative regulation of cell adhesion                       | 0.18 | 0    | 1 | 1 |
| lipid raft localization                                    | 0.09 | 0    | 1 | 1 |
| aminophospholipid transport                                | 0.18 | 0    | 1 | 1 |
| leukocyte migration                                        | 0.65 | 0.51 | 1 | 1 |
| embryo implantation                                        | 0.09 | 0    | 1 | 1 |
| regulation of protein complex assembly                     | 0.09 | 0    | 1 | 1 |
| proteolysis                                                | 6.37 | 6.31 | 1 | 1 |
| integrin-mediated signaling pathway                        | 0.55 | 0.51 | 1 | 1 |
| nucleotide biosynthetic process                            | 1.48 | 1.26 | 1 | 1 |
| nucleobase transport                                       | 0.09 | 0    | 1 | 1 |
| porphyrin biosynthetic process                             | 0.09 | 0    | 1 | 1 |
| response to starvation                                     | 0.09 | 0    | 1 | 1 |
| regulation of endothelial cell proliferation               | 0.18 | 0.25 | 1 | 1 |
| regulation of immune effector process                      | 0.09 | 0    | 1 | 1 |
| regulation of protein transport                            | 0.18 | 0    | 1 | 1 |
| interphase                                                 | 0.74 | 0.51 | 1 | 1 |
| pyrimidine nucleotide metabolic process                    | 0.28 | 0.25 | 1 | 1 |
| vesicle localization                                       | 0.18 | 0.25 | 1 | 1 |
| coenzyme catabolic process                                 | 0.18 | 0    | 1 | 1 |
| vesicle docking                                            | 0.46 | 0.25 | 1 | 1 |
| B cell homeostasis                                         | 0.09 | 0    | 1 | 1 |
| menstrual cycle process                                    | 0.18 | 0.25 | 1 | 1 |
| genitalia development                                      | 0.18 | 0.25 | 1 | 1 |
| antigen processing and presentation of lipid antigen via I | 0.09 | 0    | 1 | 1 |
| focal adhesion formation                                   | 0.18 | 0    | 1 | 1 |
| positive regulation of response to biotic stimulus         | 0.09 | 0    | 1 | 1 |
| positive regulation of cell adhesion                       | 0.09 | 0    | 1 | 1 |

|                                              |      |      |   |   |
|----------------------------------------------|------|------|---|---|
| maintenance of cellular protein localization | 0.09 | 0    | 1 | 1 |
| ethanol oxidation                            | 0.09 | 0    | 1 | 1 |
| RNA-mediated gene silencing                  | 0.09 | 0    | 1 | 1 |
| monosaccharide transport                     | 0.28 | 0.25 | 1 | 1 |

| Gene Ontology : biological process. Level: 7              | Percentage of genes with allele-specific expression | Percentage of genes without allele-specific expression | Unadjusted pvalue | Adjusted pvalueFDR |
|-----------------------------------------------------------|-----------------------------------------------------|--------------------------------------------------------|-------------------|--------------------|
| protein homooligomerization                               | 0.11                                                | 1.55                                                   | 0.005359601       | 1                  |
| biomineral formation                                      | 0.76                                                | 2.8                                                    | 0.009100373       | 1                  |
| double-strand break repair                                | 0.11                                                | 1.24                                                   | 0.01759404        | 1                  |
| visual learning                                           | 0.11                                                | 0.93                                                   | 0.05560903        | 1                  |
| cellular protein catabolic process                        | 1.95                                                | 4.04                                                   | 0.05866208        | 1                  |
| heparan sulfate proteoglycan metabolic process            | 0                                                   | 0.62                                                   | 0.06684507        | 1                  |
| adult heart development                                   | 0                                                   | 0.62                                                   | 0.06684507        | 1                  |
| epithelial to mesenchymal transition                      | 0                                                   | 0.62                                                   | 0.06684507        | 1                  |
| calcium ion-dependent exocytosis                          | 0                                                   | 0.62                                                   | 0.06684507        | 1                  |
| recombinational repair                                    | 0                                                   | 0.62                                                   | 0.06684507        | 1                  |
| positive regulation of phospholipase A2 activity          | 0                                                   | 0.62                                                   | 0.06684507        | 1                  |
| protein amino acid phosphorylation                        | 9.87                                                | 6.52                                                   | 0.07142957        | 1                  |
| regulation of protein kinase activity                     | 2.28                                                | 4.35                                                   | 0.07548919        | 1                  |
| intracellular protein transport                           | 3.69                                                | 6.21                                                   | 0.07890425        | 1                  |
| membrane lipid catabolic process                          | 0.22                                                | 0.93                                                   | 0.1126315         | 1                  |
| cyclic nucleotide biosynthetic process                    | 0.22                                                | 0.93                                                   | 0.1126315         | 1                  |
| acute-phase response                                      | 0.22                                                | 0.93                                                   | 0.1126315         | 1                  |
| inorganic anion transport                                 | 1.19                                                | 2.48                                                   | 0.1153819         | 1                  |
| DNA-dependent DNA replication                             | 0.65                                                | 1.55                                                   | 0.1648446         | 1                  |
| muscle fiber development                                  | 0.65                                                | 1.55                                                   | 0.1648446         | 1                  |
| positive regulation of epithelial cell proliferation      | 0.11                                                | 0.62                                                   | 0.1660901         | 1                  |
| polysaccharide biosynthetic process                       | 0.11                                                | 0.62                                                   | 0.1660901         | 1                  |
| detection of visible light                                | 0.11                                                | 0.62                                                   | 0.1660901         | 1                  |
| detection of light stimulus during sensory perception     | 0.11                                                | 0.62                                                   | 0.1660901         | 1                  |
| endoderm development                                      | 0.11                                                | 0.62                                                   | 0.1660901         | 1                  |
| fatty acid metabolic process                              | 1.74                                                | 3.11                                                   | 0.1721741         | 1                  |
| positive regulation of nucleobase, nucleoside, nucleotide | 4.34                                                | 2.48                                                   | 0.17787           | 1                  |
| cGMP metabolic process                                    | 0.33                                                | 0.93                                                   | 0.1832001         | 1                  |
| glycolipid metabolic process                              | 0.33                                                | 0.93                                                   | 0.1832001         | 1                  |
| embryonic development (sensu Mammalia)                    | 0.76                                                | 0                                                      | 0.2005548         | 1                  |
| amino acid biosynthetic process                           | 0.43                                                | 1.24                                                   | 0.2160468         | 1                  |
| ear development                                           | 0.43                                                | 1.24                                                   | 0.2160468         | 1                  |
| cell growth                                               | 2.17                                                | 0.93                                                   | 0.22816           | 1                  |
| mRNA processing                                           | 2.17                                                | 0.93                                                   | 0.22816           | 1                  |
| peptidoglycan catabolic process                           | 0                                                   | 0.31                                                   | 0.2588424         | 1                  |

|                                                          |   |      |           |   |
|----------------------------------------------------------|---|------|-----------|---|
| apical junction assembly                                 | 0 | 0.31 | 0.2588424 | 1 |
| germinal center formation                                | 0 | 0.31 | 0.2588424 | 1 |
| aspartate family amino acid metabolic process            | 0 | 0.31 | 0.2588424 | 1 |
| negative regulation of ion transport                     | 0 | 0.31 | 0.2588424 | 1 |
| photoreceptor cell maintenance                           | 0 | 0.31 | 0.2588424 | 1 |
| behavioral response to cocaine                           | 0 | 0.31 | 0.2588424 | 1 |
| lipid phosphorylation                                    | 0 | 0.31 | 0.2588424 | 1 |
| baroreceptor response to lowering of blood pressure      | 0 | 0.31 | 0.2588424 | 1 |
| bile acid metabolic process                              | 0 | 0.31 | 0.2588424 | 1 |
| peroxisomal transport                                    | 0 | 0.31 | 0.2588424 | 1 |
| negative regulation of cellular catabolic process        | 0 | 0.31 | 0.2588424 | 1 |
| biogenic amine catabolic process                         | 0 | 0.31 | 0.2588424 | 1 |
| cellular extravasation                                   | 0 | 0.31 | 0.2588424 | 1 |
| actin filament severing                                  | 0 | 0.31 | 0.2588424 | 1 |
| positive regulation of vasoconstriction                  | 0 | 0.31 | 0.2588424 | 1 |
| positive regulation of cellular catabolic process        | 0 | 0.31 | 0.2588424 | 1 |
| defense response to Gram-positive bacterium              | 0 | 0.31 | 0.2588424 | 1 |
| receptor guanylyl cyclase signaling pathway              | 0 | 0.31 | 0.2588424 | 1 |
| prostate gland development                               | 0 | 0.31 | 0.2588424 | 1 |
| cellular polysaccharide catabolic process                | 0 | 0.31 | 0.2588424 | 1 |
| regulation of Notch signaling pathway                    | 0 | 0.31 | 0.2588424 | 1 |
| peptide amidation                                        | 0 | 0.31 | 0.2588424 | 1 |
| salivary gland development                               | 0 | 0.31 | 0.2588424 | 1 |
| centrosome cycle                                         | 0 | 0.31 | 0.2588424 | 1 |
| antibacterial humoral response                           | 0 | 0.31 | 0.2588424 | 1 |
| leading edge cell differentiation                        | 0 | 0.31 | 0.2588424 | 1 |
| metabotropic glutamate receptor signaling pathway        | 0 | 0.31 | 0.2588424 | 1 |
| DNA duplex unwinding                                     | 0 | 0.31 | 0.2588424 | 1 |
| antifungal humoral response                              | 0 | 0.31 | 0.2588424 | 1 |
| mitotic recombination                                    | 0 | 0.31 | 0.2588424 | 1 |
| bilirubin conjugation                                    | 0 | 0.31 | 0.2588424 | 1 |
| non-recombinational repair                               | 0 | 0.31 | 0.2588424 | 1 |
| positive regulation of nitric oxide biosynthetic process | 0 | 0.31 | 0.2588424 | 1 |
| response to hydrogen peroxide                            | 0 | 0.31 | 0.2588424 | 1 |
| norepinephrine-epinephrine regulation of blood pressure  | 0 | 0.31 | 0.2588424 | 1 |
| ER overload response                                     | 0 | 0.31 | 0.2588424 | 1 |

|                                                          |      |      |           |   |
|----------------------------------------------------------|------|------|-----------|---|
| extracellular polysaccharide metabolic process           | 0    | 0.31 | 0.2588424 | 1 |
| regulation of urothelial cell proliferation              | 0    | 0.31 | 0.2588424 | 1 |
| regulation of vesicle fusion                             | 0    | 0.31 | 0.2588424 | 1 |
| glycoprotein biosynthetic process                        | 2.39 | 1.24 | 0.2636428 | 1 |
| dicarboxylic acid transport                              | 0.22 | 0.62 | 0.2765711 | 1 |
| transmembrane receptor protein tyrosine phosphatase s    | 0.22 | 0.62 | 0.2765711 | 1 |
| glucan metabolic process                                 | 0.22 | 0.62 | 0.2765711 | 1 |
| development of primary female sexual characteristics     | 0.22 | 0.62 | 0.2765711 | 1 |
| induction                                                | 0.22 | 0.62 | 0.2765711 | 1 |
| glycoprotein catabolic process                           | 0.22 | 0.62 | 0.2765711 | 1 |
| acylglycerol metabolic process                           | 0.22 | 0.62 | 0.2765711 | 1 |
| frizzled signaling pathway                               | 0.22 | 0.62 | 0.2765711 | 1 |
| photoreceptor cell development                           | 0.22 | 0.62 | 0.2765711 | 1 |
| glutamine family amino acid metabolic process            | 0.22 | 0.62 | 0.2765711 | 1 |
| proteoglycan biosynthetic process                        | 0.22 | 0.62 | 0.2765711 | 1 |
| aminoglycan biosynthetic process                         | 0.22 | 0.62 | 0.2765711 | 1 |
| negative regulation of progression through cell cycle    | 3.04 | 4.35 | 0.2825478 | 1 |
| brain development                                        | 2.06 | 3.11 | 0.2871908 | 1 |
| ectoderm development                                     | 1.84 | 0.93 | 0.315395  | 1 |
| hexose metabolic process                                 | 1.84 | 0.93 | 0.315395  | 1 |
| microtubule cytoskeleton organization and biogenesis     | 1.19 | 0.31 | 0.3167569 | 1 |
| positive regulation of immune response                   | 1.19 | 0.31 | 0.3167569 | 1 |
| metal ion transport                                      | 5.31 | 6.83 | 0.3291208 | 1 |
| ubiquitin cycle                                          | 4.45 | 3.11 | 0.3317314 | 1 |
| dopamine receptor signaling pathway                      | 0.54 | 0    | 0.3356444 | 1 |
| pyridine nucleotide metabolic process                    | 0.54 | 0    | 0.3356444 | 1 |
| programmed cell death                                    | 8.35 | 6.52 | 0.3371278 | 1 |
| phospholipid metabolic process                           | 0.87 | 1.55 | 0.3393898 | 1 |
| glycosaminoglycan metabolic process                      | 0.43 | 0.93 | 0.383902  | 1 |
| gonad development                                        | 0.43 | 0.93 | 0.383902  | 1 |
| gliogenesis                                              | 0.43 | 0.93 | 0.383902  | 1 |
| di-, tri-valent inorganic cation transport               | 2.17 | 3.11 | 0.3977976 | 1 |
| negative regulation of nucleobase, nucleoside, nucleotid | 4.56 | 3.42 | 0.4273414 | 1 |
| eye development                                          | 0.54 | 0.93 | 0.4337513 | 1 |
| calcium-mediated signaling                               | 0.54 | 0.93 | 0.4337513 | 1 |
| regulation of synaptic transmission                      | 0.54 | 0.93 | 0.4337513 | 1 |



|                                                 |       |       |           |   |
|-------------------------------------------------|-------|-------|-----------|---|
| lipoprotein biosynthetic process                | 0.54  | 0.93  | 0.4337513 | 1 |
| regulation of protein catabolic process         | 0.11  | 0.31  | 0.4508398 | 1 |
| T-helper 1 type immune response                 | 0.11  | 0.31  | 0.4508398 | 1 |
| steroid catabolic process                       | 0.11  | 0.31  | 0.4508398 | 1 |
| S phase                                         | 0.11  | 0.31  | 0.4508398 | 1 |
| regulation of smoothened signaling pathway      | 0.11  | 0.31  | 0.4508398 | 1 |
| cytolysis                                       | 0.11  | 0.31  | 0.4508398 | 1 |
| polyisoprenoid metabolic process                | 0.11  | 0.31  | 0.4508398 | 1 |
| lymphocyte activation during immune response    | 0.11  | 0.31  | 0.4508398 | 1 |
| myeloid leukocyte mediated immunity             | 0.11  | 0.31  | 0.4508398 | 1 |
| regulation of macrophage activation             | 0.11  | 0.31  | 0.4508398 | 1 |
| glycerolipid biosynthetic process               | 0.11  | 0.31  | 0.4508398 | 1 |
| neutral lipid biosynthetic process              | 0.11  | 0.31  | 0.4508398 | 1 |
| Mo-molybdopterin cofactor metabolic process     | 0.11  | 0.31  | 0.4508398 | 1 |
| blastoderm segmentation                         | 0.11  | 0.31  | 0.4508398 | 1 |
| leukocyte degranulation                         | 0.11  | 0.31  | 0.4508398 | 1 |
| formation of primary germ layer                 | 0.11  | 0.31  | 0.4508398 | 1 |
| positive regulation of fibroblast proliferation | 0.11  | 0.31  | 0.4508398 | 1 |
| cardiac cell differentiation                    | 0.11  | 0.31  | 0.4508398 | 1 |
| sulfur amino acid metabolic process             | 0.11  | 0.31  | 0.4508398 | 1 |
| molybdopterin cofactor biosynthetic process     | 0.11  | 0.31  | 0.4508398 | 1 |
| neuromuscular synaptic transmission             | 0.11  | 0.31  | 0.4508398 | 1 |
| positive regulation of cell migration           | 0.11  | 0.31  | 0.4508398 | 1 |
| regulation of RNA metabolic process             | 0.11  | 0.31  | 0.4508398 | 1 |
| lipoprotein catabolic process                   | 0.11  | 0.31  | 0.4508398 | 1 |
| retinoid metabolic process                      | 0.11  | 0.31  | 0.4508398 | 1 |
| retinoic acid metabolic process                 | 0.11  | 0.31  | 0.4508398 | 1 |
| lipopolysaccharide metabolic process            | 0.11  | 0.31  | 0.4508398 | 1 |
| peptide hormone secretion                       | 0.11  | 0.31  | 0.4508398 | 1 |
| nuclear transport                               | 1.52  | 2.17  | 0.4528719 | 1 |
| steroid hormone receptor signaling pathway      | 0.87  | 0.31  | 0.4605045 | 1 |
| monosaccharide catabolic process                | 0.98  | 0.31  | 0.4680323 | 1 |
| nucleocytoplasmic transport                     | 1.63  | 2.17  | 0.4732204 | 1 |
| generation of neurons                           | 5.97  | 4.66  | 0.482285  | 1 |
| regulation of transcription                     | 22.23 | 24.22 | 0.4872453 | 1 |
| regulation of cell shape                        | 0.76  | 1.24  | 0.4890871 | 1 |

|                                                       |      |      |           |   |
|-------------------------------------------------------|------|------|-----------|---|
| regulation of T cell activation                       | 0.76 | 1.24 | 0.4890871 | 1 |
| metanephros development                               | 0.76 | 1.24 | 0.4890871 | 1 |
| phosphoinositide-mediated signaling                   | 1.08 | 1.55 | 0.5539047 | 1 |
| Ras protein signal transduction                       | 2.93 | 2.17 | 0.5560774 | 1 |
| regulation of epithelial cell differentiation         | 0.33 | 0    | 0.5728754 | 1 |
| aerobic respiration                                   | 0.33 | 0    | 0.5728754 | 1 |
| positive regulation of protein secretion              | 0.33 | 0    | 0.5728754 | 1 |
| regulation of chemotaxis                              | 0.33 | 0    | 0.5728754 | 1 |
| positive chemotaxis                                   | 0.33 | 0    | 0.5728754 | 1 |
| organic anion transport                               | 0.33 | 0    | 0.5728754 | 1 |
| pinocytosis                                           | 0.33 | 0    | 0.5728754 | 1 |
| positive regulation of progression through cell cycle | 0.33 | 0    | 0.5728754 | 1 |
| serine family amino acid metabolic process            | 0.33 | 0    | 0.5728754 | 1 |
| pyruvate metabolic process                            | 0.33 | 0    | 0.5728754 | 1 |
| unfolded protein response                             | 0.33 | 0    | 0.5728754 | 1 |
| folic acid and derivative metabolic process           | 0.33 | 0    | 0.5728754 | 1 |
| monovalent inorganic cation homeostasis               | 0.33 | 0    | 0.5728754 | 1 |
| somitogenesis                                         | 0.33 | 0    | 0.5728754 | 1 |
| monosaccharide biosynthetic process                   | 0.33 | 0    | 0.5728754 | 1 |
| peptide cross-linking                                 | 0.33 | 0    | 0.5728754 | 1 |
| regulation of cytokine secretion                      | 0.33 | 0    | 0.5728754 | 1 |
| oligosaccharide biosynthetic process                  | 0.33 | 0    | 0.5728754 | 1 |
| amino acid activation                                 | 0.33 | 0    | 0.5728754 | 1 |
| gastrulation (sensu Deuterostomia)                    | 0.33 | 0    | 0.5728754 | 1 |
| oxidative phosphorylation                             | 0.33 | 0    | 0.5728754 | 1 |
| protein tetramerization                               | 0.33 | 0    | 0.5728754 | 1 |
| ribonucleoside monophosphate metabolic process        | 0.33 | 0    | 0.5728754 | 1 |
| nucleoside monophosphate biosynthetic process         | 0.33 | 0    | 0.5728754 | 1 |
| mitochondrial transport                               | 0.43 | 0    | 0.5778086 | 1 |
| regulation of Wnt receptor signaling pathway          | 0.43 | 0    | 0.5778086 | 1 |
| negative regulation of cell size                      | 0.43 | 0    | 0.5778086 | 1 |
| base-excision repair                                  | 0.43 | 0    | 0.5778086 | 1 |
| protein amino acid ADP-ribosylation                   | 0.43 | 0    | 0.5778086 | 1 |
| nucleotide-excision repair                            | 0.43 | 0    | 0.5778086 | 1 |
| biogenic amine biosynthetic process                   | 0.33 | 0.62 | 0.6088771 | 1 |
| ensheathment of neurons                               | 0.33 | 0.62 | 0.6088771 | 1 |

|                                                         |       |       |           |   |
|---------------------------------------------------------|-------|-------|-----------|---|
| negative regulation of lymphocyte activation            | 0.33  | 0.62  | 0.6088771 | 1 |
| regulation of endocytosis                               | 0.33  | 0.62  | 0.6088771 | 1 |
| gamma-aminobutyric acid signaling pathway               | 0.33  | 0.62  | 0.6088771 | 1 |
| cell projection organization and biogenesis             | 4.01  | 3.11  | 0.610386  | 1 |
| RNA splicing                                            | 1.95  | 1.24  | 0.6229159 | 1 |
| protein amino acid dephosphorylation                    | 1.95  | 2.48  | 0.6505829 | 1 |
| translational initiation                                | 0.43  | 0.62  | 0.6522511 | 1 |
| amino acid catabolic process                            | 0.43  | 0.62  | 0.6522511 | 1 |
| mesoderm development                                    | 0.43  | 0.62  | 0.6522511 | 1 |
| steroid biosynthetic process                            | 0.43  | 0.62  | 0.6522511 | 1 |
| cell cycle checkpoint                                   | 0.65  | 0.31  | 0.6844136 | 1 |
| determination of left/right symmetry                    | 0.65  | 0.31  | 0.6844136 | 1 |
| cartilage development                                   | 0.65  | 0.31  | 0.6844136 | 1 |
| regulation of DNA metabolic process                     | 0.65  | 0.31  | 0.6844136 | 1 |
| leukocyte chemotaxis                                    | 0.76  | 0.31  | 0.6880704 | 1 |
| hemopoietic or lymphoid organ development               | 3.04  | 3.42  | 0.7128128 | 1 |
| blood vessel development                                | 3.36  | 2.8   | 0.7159592 | 1 |
| membrane lipid biosynthetic process                     | 0.76  | 0.93  | 0.7247405 | 1 |
| positive regulation of cellular biosynthetic process    | 0.76  | 0.93  | 0.7247405 | 1 |
| actin cytoskeleton organization and biogenesis          | 3.8   | 3.11  | 0.7288196 | 1 |
| ribonucleotide biosynthetic process                     | 0.98  | 0.62  | 0.738273  | 1 |
| transmembrane receptor protein serine/threonine kinase  | 1.08  | 0.62  | 0.7413155 | 1 |
| embryonic limb morphogenesis                            | 1.08  | 0.62  | 0.7413155 | 1 |
| antimicrobial humoral response (sensu Vertebrata)       | 0.98  | 1.24  | 0.7507852 | 1 |
| transcription, DNA-dependent                            | 21.69 | 22.67 | 0.7544534 | 1 |
| cytokine biosynthetic process                           | 1.08  | 1.24  | 0.7650119 | 1 |
| neuropeptide signaling pathway                          | 1.3   | 1.55  | 0.7811147 | 1 |
| striated muscle development                             | 1.63  | 1.86  | 0.8024785 | 1 |
| di-, tri-valent inorganic cation homeostasis            | 1.74  | 1.86  | 0.8106393 | 1 |
| cyclic-nucleotide-mediated signaling                    | 1.95  | 1.55  | 0.8116982 | 1 |
| establishment and/or maintenance of chromatin architec  | 2.6   | 2.17  | 0.8360549 | 1 |
| transmembrane receptor protein tyrosine kinase signalin | 2.93  | 3.11  | 0.85016   | 1 |
| tRNA processing                                         | 0.33  | 0.31  | 1         | 1 |
| synaptic vesicle endocytosis                            | 0.11  | 0     | 1         | 1 |
| JAK-STAT cascade                                        | 0.43  | 0.31  | 1         | 1 |
| pyrimidine ribonucleotide metabolic process             | 0.22  | 0.31  | 1         | 1 |

|                                                            |      |      |   |   |
|------------------------------------------------------------|------|------|---|---|
| tissue regeneration                                        | 0.11 | 0    | 1 | 1 |
| negative regulation of endothelial cell proliferation      | 0.22 | 0.31 | 1 | 1 |
| long-chain fatty acid transport                            | 0.11 | 0    | 1 | 1 |
| ribonucleoside triphosphate metabolic process              | 0.54 | 0.62 | 1 | 1 |
| regulation of melanocyte differentiation                   | 0.11 | 0    | 1 | 1 |
| mRNA catabolic process                                     | 0.11 | 0    | 1 | 1 |
| monovalent inorganic cation transport                      | 3.69 | 3.73 | 1 | 1 |
| posttranslational protein folding                          | 0.22 | 0    | 1 | 1 |
| pyridoxine metabolic process                               | 0.11 | 0    | 1 | 1 |
| mRNA modification                                          | 0.11 | 0    | 1 | 1 |
| lipid raft distribution                                    | 0.11 | 0    | 1 | 1 |
| mesonephros development                                    | 0.11 | 0    | 1 | 1 |
| pyrimidine base biosynthetic process                       | 0.22 | 0    | 1 | 1 |
| MAPKKK cascade                                             | 1.84 | 1.86 | 1 | 1 |
| heme oxidation                                             | 0.11 | 0    | 1 | 1 |
| mammary gland development                                  | 0.22 | 0    | 1 | 1 |
| hexose transport                                           | 0.33 | 0.31 | 1 | 1 |
| pyrimidine nucleotide biosynthetic process                 | 0.33 | 0.31 | 1 | 1 |
| chemokine metabolic process                                | 0.11 | 0    | 1 | 1 |
| thiamin metabolic process                                  | 0.11 | 0    | 1 | 1 |
| regulation of G-protein coupled receptor protein signaling | 0.54 | 0.31 | 1 | 1 |
| regulation of translation                                  | 1.52 | 1.55 | 1 | 1 |
| positive regulation of smooth muscle cell proliferation    | 0.11 | 0    | 1 | 1 |
| Golgi vesicle transport                                    | 0.87 | 0.62 | 1 | 1 |
| negative regulation of cellular biosynthetic process       | 0.43 | 0.31 | 1 | 1 |
| ubiquinone metabolic process                               | 0.11 | 0    | 1 | 1 |
| odontogenesis                                              | 0.33 | 0.31 | 1 | 1 |
| M phase of meiotic cell cycle                              | 0.76 | 0.62 | 1 | 1 |
| negative regulation of fibroblast proliferation            | 0.11 | 0    | 1 | 1 |
| interphase of mitotic cell cycle                           | 0.87 | 0.62 | 1 | 1 |
| glycerol-3-phosphate metabolic process                     | 0.11 | 0    | 1 | 1 |
| G2 phase                                                   | 0.22 | 0    | 1 | 1 |
| entry into host                                            | 0.22 | 0    | 1 | 1 |
| negative regulation of epithelial cell proliferation       | 0.22 | 0    | 1 | 1 |
| regulation of sensory perception of pain                   | 0.11 | 0    | 1 | 1 |
| I-kappaB kinase/NF-kappaB cascade                          | 1.84 | 1.86 | 1 | 1 |

|                                                              |      |      |   |   |
|--------------------------------------------------------------|------|------|---|---|
| cytoskeleton-dependent intracellular transport               | 1.41 | 1.24 | 1 | 1 |
| androgen metabolic process                                   | 0.22 | 0.31 | 1 | 1 |
| regulation of progression through mitotic cell cycle         | 0.22 | 0.31 | 1 | 1 |
| pyrimidine nucleoside triphosphate metabolic process         | 0.22 | 0.31 | 1 | 1 |
| embryonic epithelial tube formation                          | 0.43 | 0.31 | 1 | 1 |
| muscle maintenance                                           | 0.22 | 0    | 1 | 1 |
| embryonic skeletal development                               | 0.11 | 0    | 1 | 1 |
| single strand break repair                                   | 0.22 | 0    | 1 | 1 |
| regulation of antiviral response by host                     | 0.11 | 0    | 1 | 1 |
| protein amino acid alkylation                                | 0.22 | 0    | 1 | 1 |
| protein processing                                           | 1.08 | 0.93 | 1 | 1 |
| regulation of neurotransmitter levels                        | 1.74 | 1.55 | 1 | 1 |
| protein amino acid deacetylation                             | 0.33 | 0.31 | 1 | 1 |
| pyrimidine transport                                         | 0.11 | 0    | 1 | 1 |
| positive regulation of protein complex assembly              | 0.11 | 0    | 1 | 1 |
| nucleoside triphosphate biosynthetic process                 | 0.54 | 0.62 | 1 | 1 |
| thyroid hormone metabolic process                            | 0.11 | 0    | 1 | 1 |
| regulation of innate immune response                         | 0.11 | 0    | 1 | 1 |
| regulation of protein modification                           | 0.11 | 0    | 1 | 1 |
| ribonucleoside diphosphate metabolic process                 | 0.11 | 0    | 1 | 1 |
| pyrimidine nucleoside catabolic process                      | 0.11 | 0    | 1 | 1 |
| cell killing                                                 | 0.33 | 0.31 | 1 | 1 |
| mitochondrial DNA metabolic process                          | 0.11 | 0    | 1 | 1 |
| ethanolamine and derivative metabolic process                | 0.22 | 0    | 1 | 1 |
| C21-steroid hormone metabolic process                        | 0.11 | 0    | 1 | 1 |
| alpha-beta T cell activation                                 | 0.43 | 0.31 | 1 | 1 |
| negative regulation of fat cell differentiation              | 0.11 | 0    | 1 | 1 |
| entry into cell of other organism during symbiotic interacti | 0.22 | 0    | 1 | 1 |
| leg morphogenesis                                            | 0.11 | 0    | 1 | 1 |
| hemoglobin biosynthetic process                              | 0.22 | 0    | 1 | 1 |
| RNA-mediated posttranscriptional gene silencing              | 0.11 | 0    | 1 | 1 |
| activation of plasma proteins during acute inflammatory      | 0.43 | 0.31 | 1 | 1 |
| metal ion homeostasis                                        | 1.84 | 1.86 | 1 | 1 |
| B cell proliferation                                         | 0.33 | 0.31 | 1 | 1 |
| anterior/posterior axis specification                        | 0.11 | 0    | 1 | 1 |
| neurotransmitter receptor metabolic process                  | 0.11 | 0    | 1 | 1 |

|                                                         |      |      |   |   |
|---------------------------------------------------------|------|------|---|---|
| neural tube patterning                                  | 0.11 | 0    | 1 | 1 |
| regulation of leukocyte mediated immunity               | 0.11 | 0    | 1 | 1 |
| regulation of amino acid metabolic process              | 0.54 | 0.62 | 1 | 1 |
| vesicle docking during exocytosis                       | 0.43 | 0.31 | 1 | 1 |
| adrenal gland development                               | 0.11 | 0    | 1 | 1 |
| hindlimb morphogenesis                                  | 0.22 | 0    | 1 | 1 |
| regulation of exocytosis                                | 0.33 | 0.31 | 1 | 1 |
| positive regulation of fat cell differentiation         | 0.11 | 0    | 1 | 1 |
| serotonin receptor signaling pathway                    | 0.11 | 0    | 1 | 1 |
| purine nucleoside diphosphate metabolic process         | 0.11 | 0    | 1 | 1 |
| receptor-mediated endocytosis                           | 0.87 | 0.62 | 1 | 1 |
| positive regulation of immune effector process          | 0.11 | 0    | 1 | 1 |
| pentose metabolic process                               | 0.11 | 0    | 1 | 1 |
| protein amino acid acylation                            | 0.22 | 0    | 1 | 1 |
| regulation of nucleotide metabolic process              | 0.22 | 0.31 | 1 | 1 |
| skeletal morphogenesis                                  | 0.11 | 0    | 1 | 1 |
| antigen processing and presentation, exogenous lipid ar | 0.11 | 0    | 1 | 1 |
| T-helper 2 type immune response                         | 0.11 | 0    | 1 | 1 |
| embryonic gut development                               | 0.22 | 0.31 | 1 | 1 |
| glucosamine metabolic process                           | 0.22 | 0    | 1 | 1 |
| ectodermal gut development                              | 0.22 | 0    | 1 | 1 |
| digestive tract morphogenesis                           | 0.22 | 0.31 | 1 | 1 |
| rRNA processing                                         | 0.22 | 0.31 | 1 | 1 |
| menstrual cycle phase                                   | 0.22 | 0.31 | 1 | 1 |
| estrogen metabolic process                              | 0.22 | 0.31 | 1 | 1 |
| oocyte differentiation                                  | 0.22 | 0    | 1 | 1 |
| negative regulation of protein transport                | 0.22 | 0    | 1 | 1 |
| somatic cell DNA recombination                          | 0.22 | 0    | 1 | 1 |
| sphingolipid metabolic process                          | 0.76 | 0.62 | 1 | 1 |
| indole derivative biosynthetic process                  | 0.11 | 0    | 1 | 1 |
| establishment of nucleus localization                   | 0.11 | 0    | 1 | 1 |
| forelimb morphogenesis                                  | 0.22 | 0    | 1 | 1 |
| phospholipid dephosphorylation                          | 0.22 | 0    | 1 | 1 |
| tubulin folding                                         | 0.22 | 0    | 1 | 1 |
| lipid glycosylation                                     | 0.11 | 0    | 1 | 1 |
| acetyl-CoA catabolic process                            | 0.22 | 0    | 1 | 1 |

|                                              |      |      |   |   |
|----------------------------------------------|------|------|---|---|
| synaptic transmission, cholinergic           | 0.11 | 0    | 1 | 1 |
| vacuolar transport                           | 0.33 | 0.31 | 1 | 1 |
| embryonic organ morphogenesis                | 0.33 | 0.31 | 1 | 1 |
| ATP-dependent proteolysis                    | 0.11 | 0    | 1 | 1 |
| sterol metabolic process                     | 0.54 | 0.62 | 1 | 1 |
| positive regulation of protein transport     | 0.11 | 0    | 1 | 1 |
| cholesterol transport                        | 0.22 | 0    | 1 | 1 |
| establishment of vesicle localization        | 0.22 | 0.31 | 1 | 1 |
| germ-line stem cell division                 | 0.11 | 0    | 1 | 1 |
| endosome transport                           | 0.54 | 0.31 | 1 | 1 |
| glycolate metabolic process                  | 0.11 | 0    | 1 | 1 |
| telomere organization and biogenesis         | 0.11 | 0    | 1 | 1 |
| dorsal/ventral axis specification            | 0.11 | 0    | 1 | 1 |
| amino acid transport                         | 0.33 | 0.31 | 1 | 1 |
| regulation of lipid kinase activity          | 0.22 | 0    | 1 | 1 |
| gonadotropin secretion                       | 0.11 | 0    | 1 | 1 |
| purine nucleotide biosynthetic process       | 0.76 | 0.62 | 1 | 1 |
| anaphase                                     | 0.11 | 0    | 1 | 1 |
| rRNA modification                            | 0.11 | 0    | 1 | 1 |
| regulation of synapse structure and activity | 0.22 | 0    | 1 | 1 |
| negative regulation of protein secretion     | 0.11 | 0    | 1 | 1 |
| purine base biosynthetic process             | 0.11 | 0    | 1 | 1 |
| peptidyl-amino acid modification             | 1.52 | 1.55 | 1 | 1 |
| positive regulation of inflammatory response | 0.11 | 0    | 1 | 1 |
| coenzyme A metabolic process                 | 0.11 | 0    | 1 | 1 |
| oogenesis (sensu Mammalia)                   | 0.11 | 0    | 1 | 1 |
| interleukin-1 secretion                      | 0.22 | 0    | 1 | 1 |
| protein kinase B signaling cascade           | 0.11 | 0    | 1 | 1 |
| nucleoside phosphate metabolic process       | 0.33 | 0.31 | 1 | 1 |
| frizzled-2 signaling pathway                 | 0.11 | 0    | 1 | 1 |
| protein maturation via proteolysis           | 0.11 | 0    | 1 | 1 |
| nucleoside diphosphate biosynthetic process  | 0.11 | 0    | 1 | 1 |
| sister chromatid segregation                 | 0.22 | 0.31 | 1 | 1 |
| disruption by symbiont of host cells         | 0.11 | 0    | 1 | 1 |
| gamma-delta T cell activation                | 0.11 | 0    | 1 | 1 |
| catecholamine metabolic process              | 0.54 | 0.62 | 1 | 1 |

|                                                         |      |      |   |   |
|---------------------------------------------------------|------|------|---|---|
| RNA 3'-end processing                                   | 0.22 | 0    | 1 | 1 |
| regulation of small GTPase mediated signal transduction | 2.17 | 2.17 | 1 | 1 |
| uracil metabolic process                                | 0.11 | 0    | 1 | 1 |
| translational elongation                                | 0.11 | 0    | 1 | 1 |
| negative regulation of inflammatory response            | 0.22 | 0    | 1 | 1 |
| acetylcholine receptor signaling, muscarinic pathway    | 0.11 | 0    | 1 | 1 |
| cAMP metabolic process                                  | 0.22 | 0.31 | 1 | 1 |
| isoprenoid biosynthetic process                         | 0.11 | 0    | 1 | 1 |
| regulation of cytokine and chemokine mediated signaling | 0.11 | 0    | 1 | 1 |
| indolalkylamine metabolic process                       | 0.11 | 0    | 1 | 1 |
| positive regulation of GTPase activity                  | 0.11 | 0    | 1 | 1 |
| positive regulation of response to tumor cell           | 0.11 | 0    | 1 | 1 |
| polarized epithelial cell differentiation               | 0.11 | 0    | 1 | 1 |
| di-, tri-valent inorganic anion homeostasis             | 0.11 | 0    | 1 | 1 |
| M phase of mitotic cell cycle                           | 1.63 | 1.55 | 1 | 1 |
| spermatid differentiation                               | 0.11 | 0    | 1 | 1 |
| protein modification by small protein conjugation       | 0.65 | 0.62 | 1 | 1 |
| re-entry into mitotic cell cycle                        | 0.22 | 0    | 1 | 1 |
| regulation of lymphocyte proliferation                  | 0.65 | 0.62 | 1 | 1 |
| thiamin diphosphate metabolic process                   | 0.11 | 0    | 1 | 1 |
| thiamin and derivative biosynthetic process             | 0.11 | 0    | 1 | 1 |
| RNA transport                                           | 0.43 | 0.31 | 1 | 1 |
| deoxyribonucleoside catabolic process                   | 0.11 | 0    | 1 | 1 |
| development of primary male sexual characteristics      | 0.33 | 0.31 | 1 | 1 |
| somatic diversification of immune receptors             | 0.22 | 0.31 | 1 | 1 |
| neural plate morphogenesis                              | 0.33 | 0.31 | 1 | 1 |
| tricarboxylic acid cycle intermediate metabolic process | 0.43 | 0.31 | 1 | 1 |
| purine transport                                        | 0.11 | 0    | 1 | 1 |
| chondroitin sulfate proteoglycan metabolic process      | 0.11 | 0    | 1 | 1 |
| metaphase                                               | 0.11 | 0    | 1 | 1 |
| organic cation transport                                | 0.22 | 0    | 1 | 1 |
| neural crest cell development                           | 0.22 | 0    | 1 | 1 |
| regulation of blood coagulation                         | 0.22 | 0    | 1 | 1 |
| regulation of smooth muscle cell differentiation        | 0.11 | 0    | 1 | 1 |
| oogenesis stage                                         | 0.11 | 0    | 1 | 1 |
| purine ribonucleotide metabolic process                 | 0.65 | 0.62 | 1 | 1 |



|                                                          |      |      |   |   |
|----------------------------------------------------------|------|------|---|---|
| butyrate metabolic process                               | 0.11 | 0    | 1 | 1 |
| lymphocyte mediated immunity                             | 0.76 | 0.62 | 1 | 1 |
| PML body organization and biogenesis                     | 0.11 | 0    | 1 | 1 |
| positive regulation of lymphocyte activation             | 0.65 | 0.62 | 1 | 1 |
| regulation of hormone secretion                          | 0.11 | 0    | 1 | 1 |
| positive regulation of vasodilation                      | 0.11 | 0    | 1 | 1 |
| protein amino acid sulfation                             | 0.22 | 0    | 1 | 1 |
| uroporphyrinogen III biosynthetic process                | 0.11 | 0    | 1 | 1 |
| protein stabilization                                    | 0.22 | 0    | 1 | 1 |
| platelet activation                                      | 0.11 | 0    | 1 | 1 |
| negative regulation of muscle cell differentiation       | 0.11 | 0    | 1 | 1 |
| regulation of B cell activation                          | 0.54 | 0.31 | 1 | 1 |
| tissue morphogenesis                                     | 0.76 | 0.62 | 1 | 1 |
| positive regulation of ion transport                     | 0.11 | 0    | 1 | 1 |
| lung development                                         | 0.54 | 0.62 | 1 | 1 |
| histidine family amino acid metabolic process            | 0.22 | 0.31 | 1 | 1 |
| protein heterooligomerization                            | 0.11 | 0    | 1 | 1 |
| establishment of cell polarity                           | 0.22 | 0    | 1 | 1 |
| midgut development                                       | 0.11 | 0    | 1 | 1 |
| pyrimidine nucleotide-sugar transport                    | 0.11 | 0    | 1 | 1 |
| membrane protein ectodomain proteolysis                  | 0.11 | 0    | 1 | 1 |
| modification of cellular component in other organism dur | 0.11 | 0    | 1 | 1 |
| pyrimidine base catabolic process                        | 0.11 | 0    | 1 | 1 |
| sister chromatid cohesion                                | 0.22 | 0    | 1 | 1 |
| aromatic amino acid family metabolic process             | 0.22 | 0.31 | 1 | 1 |
| RNA editing                                              | 0.22 | 0    | 1 | 1 |
| benzoate metabolic process                               | 0.11 | 0    | 1 | 1 |
| phagocytosis                                             | 0.33 | 0.31 | 1 | 1 |
| specification of organ identity                          | 0.22 | 0.31 | 1 | 1 |
| T cell proliferation                                     | 0.98 | 0.93 | 1 | 1 |
| modification by symbiont of host structure               | 0.11 | 0    | 1 | 1 |
| vitamin B6 biosynthetic process                          | 0.11 | 0    | 1 | 1 |
| formate metabolic process                                | 0.11 | 0    | 1 | 1 |
| tricarboxylic acid transport                             | 0.11 | 0    | 1 | 1 |
| branched chain family amino acid metabolic process       | 0.22 | 0    | 1 | 1 |
| conditioned taste aversion                               | 0.11 | 0    | 1 | 1 |

|                                                          |      |      |   |   |
|----------------------------------------------------------|------|------|---|---|
| beta-amyloid metabolic process                           | 0.11 | 0    | 1 | 1 |
| cyclic nucleotide catabolic process                      | 0.11 | 0    | 1 | 1 |
| regulation of carbohydrate biosynthetic process          | 0.11 | 0    | 1 | 1 |
| nerve-nerve synaptic transmission                        | 0.33 | 0.31 | 1 | 1 |
| immunoglobulin production                                | 0.22 | 0.31 | 1 | 1 |
| purine ribonucleoside metabolic process                  | 0.22 | 0    | 1 | 1 |
| pyrimidine deoxyribonucleoside metabolic process         | 0.11 | 0    | 1 | 1 |
| segment specification                                    | 0.22 | 0    | 1 | 1 |
| regulation of phosphate metabolic process                | 0.76 | 0.62 | 1 | 1 |
| monocarboxylic acid transport                            | 0.11 | 0    | 1 | 1 |
| establishment and/or maintenance of apical/basal cell pc | 0.11 | 0    | 1 | 1 |
| quinone cofactor biosynthetic process                    | 0.11 | 0    | 1 | 1 |
| regulation of immune response to tumor cell              | 0.11 | 0    | 1 | 1 |
| purine nucleoside triphosphate metabolic process         | 0.54 | 0.62 | 1 | 1 |

| Gene Ontology : biological process. Level: 8                     | Percentage of genes with allele-specific expression | Percentage of genes without allele-specific expression | Unadjusted pvalue | Adjusted pvalueFDR |
|------------------------------------------------------------------|-----------------------------------------------------|--------------------------------------------------------|-------------------|--------------------|
| ossification                                                     | 0.97                                                | 3.45                                                   | 0.01768197        | 1                  |
| proteolysis involved in cellular protein catabolic process       | 2.36                                                | 4.98                                                   | 0.0559508         | 1                  |
| activation of phospholipase A2                                   | 0                                                   | 0.77                                                   | 0.07058603        | 1                  |
| double-strand break repair via homologous recombination          | 0                                                   | 0.77                                                   | 0.07058603        | 1                  |
| heparan sulfate proteoglycan biosynthetic process                | 0                                                   | 0.77                                                   | 0.07058603        | 1                  |
| DNA strand elongation during DNA replication                     | 0                                                   | 0.77                                                   | 0.07058603        | 1                  |
| protein targeting                                                | 2.92                                                | 5.36                                                   | 0.07934332        | 1                  |
| positive regulation of transcription                             | 5.42                                                | 2.68                                                   | 0.08691233        | 1                  |
| skeletal muscle development                                      | 0.83                                                | 2.3                                                    | 0.09400779        | 1                  |
| regulation of programmed cell death                              | 7.78                                                | 4.98                                                   | 0.1574026         | 1                  |
| cell cycle arrest                                                | 1.39                                                | 2.68                                                   | 0.1738405         | 1                  |
| BMP signaling pathway                                            | 0.14                                                | 0.77                                                   | 0.1744102         | 1                  |
| detection of light stimulus during visual perception             | 0.14                                                | 0.77                                                   | 0.1744102         | 1                  |
| activated T cell proliferation                                   | 0.14                                                | 0.77                                                   | 0.1744102         | 1                  |
| catecholamine biosynthetic process                               | 0.14                                                | 0.77                                                   | 0.1744102         | 1                  |
| diacylglycerol metabolic process                                 | 0.14                                                | 0.77                                                   | 0.1744102         | 1                  |
| glycolipid catabolic process                                     | 0.14                                                | 0.77                                                   | 0.1744102         | 1                  |
| positive regulation of small GTPase mediated signal transduction | 0.14                                                | 0.77                                                   | 0.1744102         | 1                  |
| cGMP biosynthetic process                                        | 0.14                                                | 0.77                                                   | 0.1744102         | 1                  |
| epidermis development                                            | 2.22                                                | 0.77                                                   | 0.1800566         | 1                  |
| regulation of cyclin-dependent protein kinase activity           | 0.42                                                | 1.15                                                   | 0.195049          | 1                  |
| regulation of synaptic plasticity                                | 0.42                                                | 1.15                                                   | 0.195049          | 1                  |
| glial cell differentiation                                       | 0.42                                                | 1.15                                                   | 0.195049          | 1                  |
| intracellular protein transport across a membrane                | 0.42                                                | 1.15                                                   | 0.195049          | 1                  |
| sodium ion transport                                             | 1.53                                                | 0.38                                                   | 0.1993123         | 1                  |
| inner ear development                                            | 0.56                                                | 1.53                                                   | 0.219653          | 1                  |
| apoptosis                                                        | 10.56                                               | 7.66                                                   | 0.2235061         | 1                  |
| neuron differentiation                                           | 6.81                                                | 4.6                                                    | 0.2334345         | 1                  |
| phosphate transport                                              | 1.25                                                | 2.3                                                    | 0.2451004         | 1                  |
| protein amino acid glycosylation                                 | 2.92                                                | 1.53                                                   | 0.2607733         | 1                  |
| regulation of cell growth                                        | 2.08                                                | 0.77                                                   | 0.2657904         | 1                  |
| positive regulation of Notch signaling pathway                   | 0                                                   | 0.38                                                   | 0.266055          | 1                  |
| asparagine metabolic process                                     | 0                                                   | 0.38                                                   | 0.266055          | 1                  |
| regulation of DNA ligation                                       | 0                                                   | 0.38                                                   | 0.266055          | 1                  |
| phagocytosis, recognition                                        | 0                                                   | 0.38                                                   | 0.266055          | 1                  |

|                                                              |   |      |          |   |
|--------------------------------------------------------------|---|------|----------|---|
| vasoconstriction of artery during baroreceptor response      | 0 | 0.38 | 0.266055 | 1 |
| inositol phosphate-mediated signaling                        | 0 | 0.38 | 0.266055 | 1 |
| low-density lipoprotein catabolic process                    | 0 | 0.38 | 0.266055 | 1 |
| bile acid biosynthetic process                               | 0 | 0.38 | 0.266055 | 1 |
| mesoderm morphogenesis                                       | 0 | 0.38 | 0.266055 | 1 |
| fatty acid desaturation                                      | 0 | 0.38 | 0.266055 | 1 |
| actomyosin structure organization and biogenesis             | 0 | 0.38 | 0.266055 | 1 |
| bile acid catabolic process                                  | 0 | 0.38 | 0.266055 | 1 |
| transcription from RNA polymerase I promoter                 | 0 | 0.38 | 0.266055 | 1 |
| regulation of rhodopsin gene activity                        | 0 | 0.38 | 0.266055 | 1 |
| catecholamine catabolic process                              | 0 | 0.38 | 0.266055 | 1 |
| platelet activating factor metabolic process                 | 0 | 0.38 | 0.266055 | 1 |
| DNA replication initiation                                   | 0 | 0.38 | 0.266055 | 1 |
| aspartate family amino acid biosynthetic process             | 0 | 0.38 | 0.266055 | 1 |
| phospholipid catabolic process                               | 0 | 0.38 | 0.266055 | 1 |
| phospholipid transfer to membrane                            | 0 | 0.38 | 0.266055 | 1 |
| antibacterial humoral response (sensu Vertebrata)            | 0 | 0.38 | 0.266055 | 1 |
| centrosome separation                                        | 0 | 0.38 | 0.266055 | 1 |
| protein deglycosylation                                      | 0 | 0.38 | 0.266055 | 1 |
| glucan catabolic process                                     | 0 | 0.38 | 0.266055 | 1 |
| ventricular system development                               | 0 | 0.38 | 0.266055 | 1 |
| increased strength of heart contraction by epinephrine-n     | 0 | 0.38 | 0.266055 | 1 |
| inductive cell-cell signaling                                | 0 | 0.38 | 0.266055 | 1 |
| double-strand break repair via nonhomologous end joini       | 0 | 0.38 | 0.266055 | 1 |
| DNA unwinding during replication                             | 0 | 0.38 | 0.266055 | 1 |
| positive regulation of vesicle fusion                        | 0 | 0.38 | 0.266055 | 1 |
| periodic partitioning                                        | 0 | 0.38 | 0.266055 | 1 |
| positive regulation of urothelial cell proliferation         | 0 | 0.38 | 0.266055 | 1 |
| transcription from mitochondrial promoter                    | 0 | 0.38 | 0.266055 | 1 |
| antifungal humoral response (sensu Vertebrata)               | 0 | 0.38 | 0.266055 | 1 |
| positive regulation of heart contraction rate by epinephriri | 0 | 0.38 | 0.266055 | 1 |
| DNA damage induced protein phosphorylation                   | 0 | 0.38 | 0.266055 | 1 |
| striated muscle cell differentiation                         | 0 | 0.38 | 0.266055 | 1 |
| protein deubiquitination                                     | 0 | 0.38 | 0.266055 | 1 |
| galactolipid metabolic process                               | 0 | 0.38 | 0.266055 | 1 |
| sterol catabolic process                                     | 0 | 0.38 | 0.266055 | 1 |

|                                                            |       |      |           |   |
|------------------------------------------------------------|-------|------|-----------|---|
| extracellular polysaccharide biosynthetic process          | 0     | 0.38 | 0.266055  | 1 |
| lipopolysaccharide biosynthetic process                    | 0     | 0.38 | 0.266055  | 1 |
| negative regulation of macrophage activation               | 0     | 0.38 | 0.266055  | 1 |
| transcription from RNA polymerase II promoter              | 10.28 | 7.66 | 0.2689963 | 1 |
| sphingolipid catabolic process                             | 0.28  | 0.77 | 0.2889035 | 1 |
| glycosaminoglycan biosynthetic process                     | 0.28  | 0.77 | 0.2889035 | 1 |
| negative regulation of T cell activation                   | 0.28  | 0.77 | 0.2889035 | 1 |
| chloride transport                                         | 0.28  | 0.77 | 0.2889035 | 1 |
| regulation of transcription factor activity                | 0.28  | 0.77 | 0.2889035 | 1 |
| glycerophospholipid metabolic process                      | 0.28  | 0.77 | 0.2889035 | 1 |
| nuclear export                                             | 0.28  | 0.77 | 0.2889035 | 1 |
| glutamine metabolic process                                | 0.28  | 0.77 | 0.2889035 | 1 |
| glycogen metabolic process                                 | 0.28  | 0.77 | 0.2889035 | 1 |
| female gonad development                                   | 0.28  | 0.77 | 0.2889035 | 1 |
| post-Golgi vesicle-mediated transport                      | 0.28  | 0.77 | 0.2889035 | 1 |
| eye development (sensu Vertebrata)                         | 0.28  | 0.77 | 0.2889035 | 1 |
| hexose catabolic process                                   | 1.25  | 0.38 | 0.3055197 | 1 |
| chromatin assembly or disassembly                          | 0.97  | 1.92 | 0.3204053 | 1 |
| G-protein signaling, coupled to IP3 second messenger (i    | 0.97  | 1.92 | 0.3204053 | 1 |
| interleukin-6 biosynthetic process                         | 0.69  | 0    | 0.3328018 | 1 |
| transforming growth factor beta receptor signaling pathw   | 0.69  | 0    | 0.3328018 | 1 |
| transcription initiation                                   | 0.69  | 0    | 0.3328018 | 1 |
| positive regulation of protein kinase activity             | 2.08  | 3.07 | 0.3491708 | 1 |
| actin filament organization                                | 0.83  | 0    | 0.3504891 | 1 |
| calcium ion transport                                      | 2.22  | 3.45 | 0.3576195 | 1 |
| protein autoprocessing                                     | 0.56  | 1.15 | 0.3909792 | 1 |
| icosanoid metabolic process                                | 0.56  | 1.15 | 0.3909792 | 1 |
| ear morphogenesis                                          | 0.56  | 1.15 | 0.3909792 | 1 |
| negative regulation of protein kinase activity             | 0.69  | 1.15 | 0.4449706 | 1 |
| protein amino acid lipidation                              | 0.69  | 1.15 | 0.4449706 | 1 |
| activation of immune response                              | 1.11  | 0.38 | 0.4582135 | 1 |
| glutamine family amino acid biosynthetic process           | 0.14  | 0.38 | 0.4615241 | 1 |
| male gonad development                                     | 0.14  | 0.38 | 0.4615241 | 1 |
| S phase of mitotic cell cycle                              | 0.14  | 0.38 | 0.4615241 | 1 |
| negative regulation of progression through mitotic cell cy | 0.14  | 0.38 | 0.4615241 | 1 |
| mast cell mediated immunity                                | 0.14  | 0.38 | 0.4615241 | 1 |

|                                                          |      |      |           |   |
|----------------------------------------------------------|------|------|-----------|---|
| regulation of receptor mediated endocytosis              | 0.14 | 0.38 | 0.4615241 | 1 |
| interferon-gamma biosynthetic process                    | 0.14 | 0.38 | 0.4615241 | 1 |
| regulation of gliogenesis                                | 0.14 | 0.38 | 0.4615241 | 1 |
| terpenoid metabolic process                              | 0.14 | 0.38 | 0.4615241 | 1 |
| insulin secretion                                        | 0.14 | 0.38 | 0.4615241 | 1 |
| cAMP biosynthetic process                                | 0.14 | 0.38 | 0.4615241 | 1 |
| ARF protein signal transduction                          | 0.14 | 0.38 | 0.4615241 | 1 |
| intra-Golgi vesicle-mediated transport                   | 0.14 | 0.38 | 0.4615241 | 1 |
| insulin-like growth factor receptor signaling pathway    | 0.14 | 0.38 | 0.4615241 | 1 |
| androgen biosynthetic process                            | 0.14 | 0.38 | 0.4615241 | 1 |
| Mo-molybdopterin cofactor biosynthetic process           | 0.14 | 0.38 | 0.4615241 | 1 |
| regulation of JAK-STAT cascade                           | 0.14 | 0.38 | 0.4615241 | 1 |
| sulfur amino acid biosynthetic process                   | 0.14 | 0.38 | 0.4615241 | 1 |
| synaptic transmission, dopaminergic                      | 0.14 | 0.38 | 0.4615241 | 1 |
| T cell activation during immune response                 | 0.14 | 0.38 | 0.4615241 | 1 |
| Rac protein signal transduction                          | 0.14 | 0.38 | 0.4615241 | 1 |
| regulation of RNA stability                              | 0.14 | 0.38 | 0.4615241 | 1 |
| natural killer cell mediated immunity                    | 0.14 | 0.38 | 0.4615241 | 1 |
| aromatic amino acid family catabolic process             | 0.14 | 0.38 | 0.4615241 | 1 |
| RNA splicing, via endonucleolytic cleavage and ligation  | 0.14 | 0.38 | 0.4615241 | 1 |
| transcription from RNA polymerase III promoter           | 0.14 | 0.38 | 0.4615241 | 1 |
| acidic amino acid transport                              | 0.14 | 0.38 | 0.4615241 | 1 |
| triacylglycerol metabolic process                        | 0.14 | 0.38 | 0.4615241 | 1 |
| L-phenylalanine metabolic process                        | 0.14 | 0.38 | 0.4615241 | 1 |
| acylglycerol biosynthetic process                        | 0.14 | 0.38 | 0.4615241 | 1 |
| G-protein signaling, coupled to cyclic nucleotide second | 2.5  | 1.53 | 0.4691396 | 1 |
| chromatin modification                                   | 2.5  | 1.53 | 0.4691396 | 1 |
| ureteric bud development                                 | 0.83 | 1.53 | 0.4703257 | 1 |
| negative regulation of transcription                     | 5.56 | 4.21 | 0.515103  | 1 |
| peptidyl-tyrosine modification                           | 1.11 | 1.53 | 0.5303746 | 1 |
| potassium ion transport                                  | 3.06 | 3.83 | 0.544697  | 1 |
| tRNA aminoacylation                                      | 0.42 | 0    | 0.5693293 | 1 |
| serine family amino acid biosynthetic process            | 0.42 | 0    | 0.5693293 | 1 |
| ribonucleoside monophosphate biosynthetic process        | 0.42 | 0    | 0.5693293 | 1 |
| gastrulation (sensu Vertebrata)                          | 0.42 | 0    | 0.5693293 | 1 |
| neurotransmitter uptake                                  | 0.42 | 0    | 0.5693293 | 1 |

|                                                         |      |      |           |   |
|---------------------------------------------------------|------|------|-----------|---|
| cortical actin cytoskeleton organization and biogenesis | 0.42 | 0    | 0.5693293 | 1 |
| positive regulation of cytokine secretion               | 0.42 | 0    | 0.5693293 | 1 |
| regulation of positive chemotaxis                       | 0.42 | 0    | 0.5693293 | 1 |
| negative regulation of B cell activation                | 0.42 | 0    | 0.5693293 | 1 |
| hexose biosynthetic process                             | 0.42 | 0    | 0.5693293 | 1 |
| maintenance of fidelity during DNA-dependent DNA repl   | 0.42 | 0    | 0.5693293 | 1 |
| folic acid and derivative biosynthetic process          | 0.42 | 0    | 0.5693293 | 1 |
| embryonic digit morphogenesis                           | 0.42 | 0    | 0.5693293 | 1 |
| positive regulation of chemotaxis                       | 0.42 | 0    | 0.5693293 | 1 |
| actin filament-based movement                           | 0.42 | 0    | 0.5693293 | 1 |
| pyridine nucleotide biosynthetic process                | 0.42 | 0    | 0.5693293 | 1 |
| ER to Golgi vesicle-mediated transport                  | 0.56 | 0    | 0.57843   | 1 |
| DNA integrity checkpoint                                | 0.56 | 0    | 0.57843   | 1 |
| fucose metabolic process                                | 0.56 | 0    | 0.57843   | 1 |
| transition metal ion homeostasis                        | 0.56 | 0    | 0.57843   | 1 |
| nicotinamide metabolic process                          | 0.56 | 0    | 0.57843   | 1 |
| regulation of striated muscle development               | 0.56 | 0    | 0.57843   | 1 |
| spindle organization and biogenesis                     | 0.56 | 0    | 0.57843   | 1 |
| cAMP-mediated signaling                                 | 1.81 | 1.15 | 0.5801394 | 1 |
| nuclear import                                          | 1.67 | 2.3  | 0.5901221 | 1 |
| calcium ion homeostasis                                 | 1.81 | 2.3  | 0.6053717 | 1 |
| sphingoid metabolic process                             | 0.42 | 0.77 | 0.6132732 | 1 |
| positive regulation of phosphate metabolic process      | 0.42 | 0.77 | 0.6132732 | 1 |
| interleukin-2 biosynthetic process                      | 0.42 | 0.77 | 0.6132732 | 1 |
| axon ensheathment                                       | 0.42 | 0.77 | 0.6132732 | 1 |
| insulin receptor signaling pathway                      | 0.56 | 0.77 | 0.6595536 | 1 |
| cell projection biogenesis                              | 0.56 | 0.77 | 0.6595536 | 1 |
| protein ubiquitination                                  | 0.56 | 0.77 | 0.6595536 | 1 |
| positive regulation of lymphocyte proliferation         | 0.56 | 0.77 | 0.6595536 | 1 |
| androgen receptor signaling pathway                     | 0.83 | 0.38 | 0.68225   | 1 |
| regulation of neurogenesis                              | 0.83 | 0.38 | 0.68225   | 1 |
| regulation of MAPK activity                             | 0.83 | 1.15 | 0.7065722 | 1 |
| hemopoiesis                                             | 3.75 | 4.21 | 0.7110969 | 1 |
| positive regulation of protein biosynthetic process     | 0.97 | 1.15 | 0.7309491 | 1 |
| regulation of cytokine biosynthetic process             | 1.25 | 1.53 | 0.7543467 | 1 |
| glucose metabolic process                               | 1.67 | 1.15 | 0.7705619 | 1 |

|                                                        |       |       |           |   |
|--------------------------------------------------------|-------|-------|-----------|---|
| regulation of I-kappaB kinase/NF-kappaB cascade        | 1.67  | 1.15  | 0.7705619 | 1 |
| microtubule-based movement                             | 1.39  | 1.53  | 0.7706805 | 1 |
| regulation of Ras protein signal transduction          | 2.36  | 1.92  | 0.8102265 | 1 |
| Rho protein signal transduction                        | 2.5   | 1.92  | 0.8115185 | 1 |
| blood vessel morphogenesis                             | 3.47  | 3.07  | 0.8435508 | 1 |
| regulation of transcription, DNA-dependent             | 26.94 | 27.59 | 0.8709582 | 1 |
| chondroitin sulfate metabolic process                  | 0.14  | 0     | 1         | 1 |
| eye development (sensu Endopterygota)                  | 0.14  | 0     | 1         | 1 |
| lymphocyte costimulation                               | 0.14  | 0     | 1         | 1 |
| positive regulation of B cell activation               | 0.28  | 0.38  | 1         | 1 |
| interleukin-1 biosynthetic process                     | 0.14  | 0     | 1         | 1 |
| regulation of DNA recombination                        | 0.14  | 0     | 1         | 1 |
| acyl-CoA metabolic process                             | 0.14  | 0     | 1         | 1 |
| neurotransmitter metabolic process                     | 0.69  | 0.77  | 1         | 1 |
| negative regulation of smoothened signaling pathway    | 0.14  | 0     | 1         | 1 |
| somatic diversification of immunoglobulins             | 0.28  | 0.38  | 1         | 1 |
| neurite regeneration                                   | 0.14  | 0     | 1         | 1 |
| lysosomal transport                                    | 0.28  | 0.38  | 1         | 1 |
| ammonium transport                                     | 0.14  | 0     | 1         | 1 |
| protein depalmitoylation                               | 0.14  | 0     | 1         | 1 |
| purine ribonucleoside diphosphate metabolic process    | 0.14  | 0     | 1         | 1 |
| negative regulation of protein biosynthetic process    | 0.56  | 0.38  | 1         | 1 |
| synaptic transmission, glutamatergic                   | 0.28  | 0     | 1         | 1 |
| cysteine metabolic process                             | 0.14  | 0     | 1         | 1 |
| 'de novo' pyrimidine base biosynthetic process         | 0.28  | 0     | 1         | 1 |
| cholesterol metabolic process                          | 0.69  | 0.77  | 1         | 1 |
| estrogen catabolic process                             | 0.14  | 0     | 1         | 1 |
| positive regulation of epithelial cell differentiation | 0.14  | 0     | 1         | 1 |
| purine nucleoside diphosphate biosynthetic process     | 0.14  | 0     | 1         | 1 |
| regulation of leukocyte degranulation                  | 0.14  | 0     | 1         | 1 |
| positive regulation of T cell activation               | 0.69  | 0.77  | 1         | 1 |
| regulation of DNA replication                          | 0.28  | 0     | 1         | 1 |
| receptor internalization                               | 0.14  | 0     | 1         | 1 |
| meiosis                                                | 0.97  | 0.77  | 1         | 1 |
| mitosis                                                | 2.08  | 1.92  | 1         | 1 |
| chondroitin sulfate proteoglycan biosynthetic process  | 0.14  | 0     | 1         | 1 |



|                                                     |      |      |   |   |
|-----------------------------------------------------|------|------|---|---|
| sperm chromatin decondensation                      | 0.14 | 0    | 1 | 1 |
| RNA interference                                    | 0.14 | 0    | 1 | 1 |
| interleukin-8 biosynthetic process                  | 0.14 | 0    | 1 | 1 |
| embryonic forelimb morphogenesis                    | 0.14 | 0    | 1 | 1 |
| peroxisomal long-chain fatty acid import            | 0.14 | 0    | 1 | 1 |
| pyrimidine deoxyribonucleoside catabolic process    | 0.14 | 0    | 1 | 1 |
| fatty acid biosynthetic process                     | 0.83 | 0.77 | 1 | 1 |
| regulation of lymphocyte mediated immunity          | 0.14 | 0    | 1 | 1 |
| positive regulation of protein modification         | 0.14 | 0    | 1 | 1 |
| male genitalia development                          | 0.28 | 0.38 | 1 | 1 |
| regulation of cyclic nucleotide metabolic process   | 0.28 | 0.38 | 1 | 1 |
| glial cell migration                                | 0.14 | 0    | 1 | 1 |
| epidermal growth factor receptor signaling pathway  | 0.56 | 0.38 | 1 | 1 |
| mRNA transcription                                  | 0.14 | 0    | 1 | 1 |
| embryonic ectodermal gut development                | 0.28 | 0    | 1 | 1 |
| estrogen biosynthetic process                       | 0.14 | 0    | 1 | 1 |
| sodium ion homeostasis                              | 0.14 | 0    | 1 | 1 |
| macrophage chemotaxis                               | 0.28 | 0    | 1 | 1 |
| protein amino acid methylation                      | 0.28 | 0    | 1 | 1 |
| induction of an organ                               | 0.28 | 0.38 | 1 | 1 |
| regulation of cell killing                          | 0.28 | 0.38 | 1 | 1 |
| UDP-N-acetylglucosamine transport                   | 0.14 | 0    | 1 | 1 |
| killing of cells of another organism                | 0.14 | 0    | 1 | 1 |
| purine ribonucleotide biosynthetic process          | 0.83 | 0.77 | 1 | 1 |
| patched ligand processing                           | 0.14 | 0    | 1 | 1 |
| regulation of fatty acid metabolic process          | 0.14 | 0    | 1 | 1 |
| negative regulation of lymphocyte proliferation     | 0.28 | 0    | 1 | 1 |
| neuroblast proliferation                            | 0.14 | 0    | 1 | 1 |
| midbrain development                                | 0.28 | 0    | 1 | 1 |
| arginine metabolic process                          | 0.14 | 0    | 1 | 1 |
| interleukin-13 biosynthetic process                 | 0.14 | 0    | 1 | 1 |
| neuron migration                                    | 1.67 | 1.53 | 1 | 1 |
| fatty acid oxidation                                | 0.28 | 0.38 | 1 | 1 |
| modification by symbiont of host cellular component | 0.14 | 0    | 1 | 1 |
| establishment of apical/basal cell polarity         | 0.14 | 0    | 1 | 1 |
| beta-tubulin folding                                | 0.14 | 0    | 1 | 1 |

|                                                           |      |      |   |   |
|-----------------------------------------------------------|------|------|---|---|
| telomere maintenance                                      | 0.14 | 0    | 1 | 1 |
| hydrogen ion homeostasis                                  | 0.28 | 0    | 1 | 1 |
| positive regulation of endocytosis                        | 0.28 | 0.38 | 1 | 1 |
| chaperone cofactor-dependent protein folding              | 0.14 | 0    | 1 | 1 |
| purine nucleoside triphosphate biosynthetic process       | 0.69 | 0.77 | 1 | 1 |
| valine metabolic process                                  | 0.14 | 0    | 1 | 1 |
| transcription-coupled nucleotide-excision repair          | 0.14 | 0    | 1 | 1 |
| peptidyl-threonine modification                           | 0.14 | 0    | 1 | 1 |
| UDP-xylose transport                                      | 0.14 | 0    | 1 | 1 |
| chondrocyte differentiation                               | 0.14 | 0    | 1 | 1 |
| succinyl-CoA metabolic process                            | 0.28 | 0.38 | 1 | 1 |
| amyloid precursor protein metabolic process               | 0.14 | 0    | 1 | 1 |
| histidine family amino acid catabolic process             | 0.28 | 0.38 | 1 | 1 |
| tripartite regional subdivision                           | 0.14 | 0    | 1 | 1 |
| oocyte development                                        | 0.28 | 0    | 1 | 1 |
| regulation of gamma-delta T cell activation               | 0.14 | 0    | 1 | 1 |
| pyrimidine ribonucleotide biosynthetic process            | 0.28 | 0.38 | 1 | 1 |
| interleukin-12 biosynthetic process                       | 0.28 | 0.38 | 1 | 1 |
| N-acetylglucosamine metabolic process                     | 0.28 | 0    | 1 | 1 |
| ribonucleoside diphosphate biosynthetic process           | 0.14 | 0    | 1 | 1 |
| phospholipid biosynthetic process                         | 0.69 | 0.77 | 1 | 1 |
| L-amino acid transport                                    | 0.14 | 0    | 1 | 1 |
| negative regulation of smooth muscle cell differentiation | 0.14 | 0    | 1 | 1 |
| tricarboxylic acid cycle                                  | 0.28 | 0    | 1 | 1 |
| negative regulation of nucleotide metabolic process       | 0.14 | 0    | 1 | 1 |
| regulation of B cell proliferation                        | 0.28 | 0.38 | 1 | 1 |
| negative regulation of amino acid metabolic process       | 0.14 | 0    | 1 | 1 |
| negative regulation of hormone secretion                  | 0.14 | 0    | 1 | 1 |
| neural crest cell migration                               | 0.28 | 0    | 1 | 1 |
| establishment of lymphocyte polarity                      | 0.14 | 0    | 1 | 1 |
| interleukin-1 beta secretion                              | 0.28 | 0    | 1 | 1 |
| ribonucleoside triphosphate biosynthetic process          | 0.69 | 0.77 | 1 | 1 |
| regulation of translational initiation                    | 0.28 | 0.38 | 1 | 1 |
| mRNA transport                                            | 0.56 | 0.38 | 1 | 1 |
| protein sumoylation                                       | 0.28 | 0    | 1 | 1 |
| mitochondrial DNA replication                             | 0.14 | 0    | 1 | 1 |

|                                                             |      |      |   |   |
|-------------------------------------------------------------|------|------|---|---|
| spindle checkpoint                                          | 0.14 | 0    | 1 | 1 |
| hindbrain development                                       | 0.28 | 0    | 1 | 1 |
| positive regulation of progression through mitotic cell cyc | 0.14 | 0    | 1 | 1 |
| choline metabolic process                                   | 0.14 | 0    | 1 | 1 |
| embryonic digestive tract morphogenesis                     | 0.28 | 0.38 | 1 | 1 |
| purine ribonucleoside triphosphate metabolic process        | 0.69 | 0.77 | 1 | 1 |
| long-chain fatty acid metabolic process                     | 0.14 | 0    | 1 | 1 |
| gut morphogenesis                                           | 0.28 | 0.38 | 1 | 1 |
| uracil catabolic process                                    | 0.14 | 0    | 1 | 1 |
| protein amino acid acetylation                              | 0.14 | 0    | 1 | 1 |
| chaperonin-mediated tubulin folding                         | 0.14 | 0    | 1 | 1 |
| positive regulation of DNA metabolic process                | 0.28 | 0.38 | 1 | 1 |
| regulation of phosphorylation                               | 0.97 | 0.77 | 1 | 1 |
| bile acid transport                                         | 0.14 | 0    | 1 | 1 |
| chemokine biosynthetic process                              | 0.14 | 0    | 1 | 1 |
| negative regulation of phosphate metabolic process          | 0.14 | 0    | 1 | 1 |
| endoderm formation                                          | 0.14 | 0    | 1 | 1 |
| vesicle targeting                                           | 0.28 | 0.38 | 1 | 1 |
| negative regulation of small GTPase mediated signal tra     | 0.14 | 0    | 1 | 1 |
| pyrimidine ribonucleoside triphosphate metabolic proces     | 0.28 | 0.38 | 1 | 1 |
| peptidyl-asparagine modification                            | 0.42 | 0.38 | 1 | 1 |
| hyaluronan metabolic process                                | 0.14 | 0    | 1 | 1 |
| tyrosine metabolic process                                  | 0.14 | 0    | 1 | 1 |
| neutral amino acid transport                                | 0.14 | 0    | 1 | 1 |
| microtubule bundle formation                                | 0.28 | 0    | 1 | 1 |
| signal peptide processing                                   | 0.28 | 0    | 1 | 1 |
| somatic diversification of immune receptors via germline    | 0.28 | 0    | 1 | 1 |
| nerve growth factor receptor signaling pathway              | 0.14 | 0    | 1 | 1 |
| leukocyte mediated cytotoxicity                             | 0.28 | 0.38 | 1 | 1 |
| retrograde transport, endosome to Golgi                     | 0.14 | 0    | 1 | 1 |
| regulation of mitochondrial membrane permeability           | 0.14 | 0    | 1 | 1 |
| odontogenesis (sensu Vertebrata)                            | 0.42 | 0.38 | 1 | 1 |
| transition metal ion transport                              | 0.56 | 0.38 | 1 | 1 |
| regulation of phosphoinositide 3-kinase activity            | 0.14 | 0    | 1 | 1 |
| cartilage condensation                                      | 0.28 | 0    | 1 | 1 |
| regulation of alpha-beta T cell activation                  | 0.14 | 0    | 1 | 1 |

|                                                      |      |      |   |   |
|------------------------------------------------------|------|------|---|---|
| thymidine metabolic process                          | 0.14 | 0    | 1 | 1 |
| peptide hormone processing                           | 0.14 | 0    | 1 | 1 |
| blood vessel maturation                              | 0.14 | 0    | 1 | 1 |
| spermatid development                                | 0.14 | 0    | 1 | 1 |
| fibroblast growth factor receptor signaling pathway  | 0.28 | 0.38 | 1 | 1 |
| phagocytosis, engulfment                             | 0.14 | 0    | 1 | 1 |
| signal complex formation                             | 0.28 | 0    | 1 | 1 |
| phosphate ion homeostasis                            | 0.14 | 0    | 1 | 1 |
| tumor necrosis factor-beta biosynthetic process      | 0.28 | 0    | 1 | 1 |
| peptidyl-histidine modification                      | 0.14 | 0    | 1 | 1 |
| primary follicle stage, oogenesis (sensu Mammalia)   | 0.14 | 0    | 1 | 1 |
| regulation of nucleotide biosynthetic process        | 0.14 | 0    | 1 | 1 |
| regulation of MAPKKK cascade                         | 0.28 | 0    | 1 | 1 |
| neurotransmitter secretion                           | 1.53 | 1.53 | 1 | 1 |
| positive regulation of exocytosis                    | 0.28 | 0    | 1 | 1 |
| estrogen receptor signaling pathway                  | 0.14 | 0    | 1 | 1 |
| regulation of MHC class II biosynthetic process      | 0.28 | 0    | 1 | 1 |
| RNA polyadenylation                                  | 0.28 | 0    | 1 | 1 |
| positive regulation of immune response to tumor cell | 0.14 | 0    | 1 | 1 |
| regulation of pinocytosis                            | 0.28 | 0    | 1 | 1 |
| actin cytoskeleton reorganization                    | 0.14 | 0    | 1 | 1 |
| Notch receptor processing                            | 0.14 | 0    | 1 | 1 |
| ephrin receptor signaling pathway                    | 0.14 | 0    | 1 | 1 |
| mannose metabolic process                            | 0.28 | 0    | 1 | 1 |
| malate metabolic process                             | 0.28 | 0    | 1 | 1 |
| positive regulation of leukocyte mediated immunity   | 0.14 | 0    | 1 | 1 |
| lymph node development                               | 0.14 | 0    | 1 | 1 |
| rostrocaudal neural tube patterning                  | 0.14 | 0    | 1 | 1 |
| negative regulation of blood coagulation             | 0.28 | 0    | 1 | 1 |
| cGMP catabolic process                               | 0.14 | 0    | 1 | 1 |
| lymphocyte chemotaxis                                | 0.28 | 0    | 1 | 1 |
| L-serine metabolic process                           | 0.28 | 0    | 1 | 1 |
| succinate transport                                  | 0.14 | 0    | 1 | 1 |
| regulation of gonadotropin secretion                 | 0.14 | 0    | 1 | 1 |
| actin polymerization and/or depolymerization         | 1.11 | 1.15 | 1 | 1 |
| alpha-beta T cell proliferation                      | 0.28 | 0    | 1 | 1 |

|                                                           |      |      |   |   |
|-----------------------------------------------------------|------|------|---|---|
| positive regulation of amino acid metabolic process       | 0.42 | 0.38 | 1 | 1 |
| alveolus development                                      | 0.14 | 0    | 1 | 1 |
| lipid raft polarization                                   | 0.14 | 0    | 1 | 1 |
| branched chain family amino acid catabolic process        | 0.14 | 0    | 1 | 1 |
| microtubule polymerization or depolymerization            | 0.14 | 0    | 1 | 1 |
| base conversion or substitution editing                   | 0.14 | 0    | 1 | 1 |
| base-excision repair, gap-filling                         | 0.14 | 0    | 1 | 1 |
| G2 phase of mitotic cell cycle                            | 0.28 | 0    | 1 | 1 |
| eye morphogenesis                                         | 0.42 | 0.38 | 1 | 1 |
| proton transport                                          | 0.69 | 0.38 | 1 | 1 |
| regulation of T cell proliferation                        | 0.83 | 0.77 | 1 | 1 |
| posterior midgut development                              | 0.14 | 0    | 1 | 1 |
| glucose transport                                         | 0.42 | 0.38 | 1 | 1 |
| B cell mediated immunity                                  | 0.69 | 0.38 | 1 | 1 |
| intermediate mesoderm development                         | 0.14 | 0    | 1 | 1 |
| negative regulation of cytokine and chemokine mediated    | 0.14 | 0    | 1 | 1 |
| thiamin diphosphate biosynthetic process                  | 0.14 | 0    | 1 | 1 |
| glucan biosynthetic process                               | 0.14 | 0    | 1 | 1 |
| citrate transport                                         | 0.14 | 0    | 1 | 1 |
| RNA splicing, via transesterification reactions           | 0.69 | 0.77 | 1 | 1 |
| regulation of catecholamine metabolic process             | 0.14 | 0    | 1 | 1 |
| JNK cascade                                               | 0.83 | 0.77 | 1 | 1 |
| regulation of calcium-mediated signaling                  | 0.14 | 0    | 1 | 1 |
| glycosphingolipid metabolic process                       | 0.42 | 0.38 | 1 | 1 |
| fructose metabolic process                                | 0.14 | 0    | 1 | 1 |
| follicle-stimulating hormone secretion                    | 0.14 | 0    | 1 | 1 |
| mRNA editing                                              | 0.14 | 0    | 1 | 1 |
| histidine metabolic process                               | 0.28 | 0.38 | 1 | 1 |
| embryonic skeletal morphogenesis                          | 0.14 | 0    | 1 | 1 |
| G2/M transition of mitotic cell cycle                     | 0.14 | 0    | 1 | 1 |
| negative regulation of Wnt receptor signaling pathway     | 0.28 | 0    | 1 | 1 |
| indolalkylamine biosynthetic process                      | 0.14 | 0    | 1 | 1 |
| establishment and/or maintenance of epithelial cell polar | 0.14 | 0    | 1 | 1 |
| interleukin-4 biosynthetic process                        | 0.14 | 0    | 1 | 1 |
| modification by organism of cell membrane in other orga   | 0.14 | 0    | 1 | 1 |
| embryonic hindlimb morphogenesis                          | 0.28 | 0    | 1 | 1 |

|                                                           |      |      |   |   |
|-----------------------------------------------------------|------|------|---|---|
| pyridoxine biosynthetic process                           | 0.14 | 0    | 1 | 1 |
| granulocyte macrophage colony-stimulating factor biosyn   | 0.28 | 0    | 1 | 1 |
| forebrain development                                     | 1.11 | 1.15 | 1 | 1 |
| purine ribonucleoside salvage                             | 0.28 | 0    | 1 | 1 |
| ubiquinone biosynthetic process                           | 0.14 | 0    | 1 | 1 |
| positive regulation of hormone secretion                  | 0.14 | 0    | 1 | 1 |
| T cell mediated immunity                                  | 0.14 | 0    | 1 | 1 |
| vascular endothelial growth factor receptor signaling pat | 0.14 | 0    | 1 | 1 |
| regulation of actin filament length                       | 0.69 | 0.77 | 1 | 1 |
| negative regulation of DNA metabolic process              | 0.14 | 0    | 1 | 1 |
| entry into host cell                                      | 0.28 | 0    | 1 | 1 |
| opsonization                                              | 0.14 | 0    | 1 | 1 |
| coenzyme A biosynthetic process                           | 0.14 | 0    | 1 | 1 |
| glycolipid biosynthetic process                           | 0.28 | 0.38 | 1 | 1 |
| protein heterotetramerization                             | 0.14 | 0    | 1 | 1 |
| sphingolipid biosynthetic process                         | 0.28 | 0    | 1 | 1 |
| arm morphogenesis                                         | 0.14 | 0    | 1 | 1 |
| mRNA 3'-end processing                                    | 0.28 | 0    | 1 | 1 |
| regulation of nucleocytoplasmic transport                 | 0.28 | 0    | 1 | 1 |
| G1/S transition of mitotic cell cycle                     | 0.56 | 0.38 | 1 | 1 |
| fused antrum stage, oogenesis (sensu Mammalia)            | 0.14 | 0    | 1 | 1 |
| I-kappaB phosphorylation                                  | 0.28 | 0    | 1 | 1 |
| neural tube formation                                     | 0.42 | 0.38 | 1 | 1 |
| eosinophil chemotaxis                                     | 0.14 | 0    | 1 | 1 |
| regulation of interleukin-1 secretion                     | 0.28 | 0    | 1 | 1 |
| male germ-line stem cell division                         | 0.14 | 0    | 1 | 1 |
| neutrophil chemotaxis                                     | 0.56 | 0.38 | 1 | 1 |
| C21-steroid hormone biosynthetic process                  | 0.14 | 0    | 1 | 1 |
| tryptophan metabolic process                              | 0.14 | 0    | 1 | 1 |
| interleukin-3 biosynthetic process                        | 0.14 | 0    | 1 | 1 |
| cytoplasmic sequestering of protein                       | 0.14 | 0    | 1 | 1 |
| positive regulation of innate immune response             | 0.14 | 0    | 1 | 1 |

| Gene Ontology : biological process. Level: 9            | Percentage of genes with allele-specific expression | Percentage of genes without allele-specific expression | Unadjusted pvalue | Adjusted pvalueFDR |
|---------------------------------------------------------|-----------------------------------------------------|--------------------------------------------------------|-------------------|--------------------|
| regulation of ossification                              | 0                                                   | 2                                                      | 0.01934914        | 1                  |
| bone mineralization                                     | 0                                                   | 2                                                      | 0.01934914        | 1                  |
| positive regulation of transcription, DNA-dependent     | 8.87                                                | 3.33                                                   | 0.02764696        | 1                  |
| positive regulation of programmed cell death            | 6.9                                                 | 2.67                                                   | 0.0648839         | 1                  |
| phototransduction                                       | 0                                                   | 1.33                                                   | 0.07242854        | 1                  |
| calcium-dependent phospholipase A2 activation           | 0                                                   | 1.33                                                   | 0.07242854        | 1                  |
| blood vessel remodeling                                 | 0                                                   | 1.33                                                   | 0.07242854        | 1                  |
| chromatin assembly                                      | 0.74                                                | 2.67                                                   | 0.08893205        | 1                  |
| collagen catabolic process                              | 0.49                                                | 2                                                      | 0.1245022         | 1                  |
| regulation of apoptosis                                 | 13.55                                               | 8.67                                                   | 0.1445579         | 1                  |
| regulation of transcription from RNA polymerase II prom | 14.29                                               | 9.33                                                   | 0.1541752         | 1                  |
| modification-dependent protein catabolic process        | 3.69                                                | 6.67                                                   | 0.1647821         | 1                  |
| skeletal muscle fiber development                       | 1.48                                                | 3.33                                                   | 0.1770124         | 1                  |
| neuron fate commitment                                  | 0.25                                                | 1.33                                                   | 0.1785873         | 1                  |
| regulation of neuronal synaptic plasticity              | 0.25                                                | 1.33                                                   | 0.1785873         | 1                  |
| protein amino acid O-linked glycosylation               | 0.25                                                | 1.33                                                   | 0.1785873         | 1                  |
| synaptic vesicle exocytosis                             | 0.25                                                | 1.33                                                   | 0.1785873         | 1                  |
| protein export from nucleus                             | 0.25                                                | 1.33                                                   | 0.1785873         | 1                  |
| phosphoinositide metabolic process                      | 0.25                                                | 1.33                                                   | 0.1785873         | 1                  |
| hair follicle development                               | 1.72                                                | 0                                                      | 0.1980866         | 1                  |
| regulation of mitosis                                   | 1.48                                                | 0                                                      | 0.1981695         | 1                  |
| triacylglycerol biosynthetic process                    | 0                                                   | 0.67                                                   | 0.2697842         | 1                  |
| striated muscle cell development                        | 0                                                   | 0.67                                                   | 0.2697842         | 1                  |
| regulation of transcription from RNA polymerase I prom  | 0                                                   | 0.67                                                   | 0.2697842         | 1                  |
| S-adenosylmethionine biosynthetic process               | 0                                                   | 0.67                                                   | 0.2697842         | 1                  |
| neurotransmitter catabolic process                      | 0                                                   | 0.67                                                   | 0.2697842         | 1                  |
| mesoderm formation                                      | 0                                                   | 0.67                                                   | 0.2697842         | 1                  |
| sphingoid catabolic process                             | 0                                                   | 0.67                                                   | 0.2697842         | 1                  |
| Schwann cell differentiation                            | 0                                                   | 0.67                                                   | 0.2697842         | 1                  |
| positive regulation of B cell proliferation             | 0                                                   | 0.67                                                   | 0.2697842         | 1                  |
| protein targeting to peroxisome                         | 0                                                   | 0.67                                                   | 0.2697842         | 1                  |
| telencephalon development                               | 0                                                   | 0.67                                                   | 0.2697842         | 1                  |
| positive regulation of DNA ligation                     | 0                                                   | 0.67                                                   | 0.2697842         | 1                  |
| endochondral ossification                               | 0                                                   | 0.67                                                   | 0.2697842         | 1                  |
| protein autoubiquitination                              | 0                                                   | 0.67                                                   | 0.2697842         | 1                  |

|                                                                  |      |      |           |   |
|------------------------------------------------------------------|------|------|-----------|---|
| retrograde transport, vesicle recycling within Golgi             | 0    | 0.67 | 0.2697842 | 1 |
| platelet activating factor biosynthetic process                  | 0    | 0.67 | 0.2697842 | 1 |
| positive regulation of gliogenesis                               | 0    | 0.67 | 0.2697842 | 1 |
| cholesterol catabolic process                                    | 0    | 0.67 | 0.2697842 | 1 |
| ovulation (sensu Mammalia)                                       | 0    | 0.67 | 0.2697842 | 1 |
| asparagine biosynthetic process                                  | 0    | 0.67 | 0.2697842 | 1 |
| oxidized low-density lipoprotein catabolic process               | 0    | 0.67 | 0.2697842 | 1 |
| segment polarity determination                                   | 0    | 0.67 | 0.2697842 | 1 |
| mitotic centrosome separation                                    | 0    | 0.67 | 0.2697842 | 1 |
| negative regulation of transcription factor activity             | 0    | 0.67 | 0.2697842 | 1 |
| galactolipid catabolic process                                   | 0    | 0.67 | 0.2697842 | 1 |
| glycogen catabolic process                                       | 0    | 0.67 | 0.2697842 | 1 |
| fatty acid beta-oxidation                                        | 0    | 0.67 | 0.2697842 | 1 |
| glutamine biosynthetic process                                   | 0    | 0.67 | 0.2697842 | 1 |
| regulation of cGMP metabolic process                             | 0    | 0.67 | 0.2697842 | 1 |
| lagging strand elongation                                        | 0    | 0.67 | 0.2697842 | 1 |
| Golgi to plasma membrane transport                               | 0    | 0.67 | 0.2697842 | 1 |
| leukotriene metabolic process                                    | 0.49 | 1.33 | 0.2952085 | 1 |
| protein prenylation                                              | 0.49 | 1.33 | 0.2952085 | 1 |
| eye development (sensu Mammalia)                                 | 0.49 | 1.33 | 0.2952085 | 1 |
| ureteric bud branching                                           | 0.49 | 1.33 | 0.2952085 | 1 |
| neurotransmitter biosynthetic process                            | 0.49 | 1.33 | 0.2952085 | 1 |
| actin filament depolymerization                                  | 0.49 | 1.33 | 0.2952085 | 1 |
| positive regulation of neurogenesis                              | 1.23 | 0    | 0.3307322 | 1 |
| activation of protein kinase activity                            | 1.97 | 3.33 | 0.3510684 | 1 |
| G-protein signaling, coupled to cAMP nucleotide second messenger | 3.2  | 1.33 | 0.3755438 | 1 |
| inner ear morphogenesis                                          | 0.99 | 2    | 0.3940697 | 1 |
| protein amino acid autophosphorylation                           | 0.99 | 2    | 0.3940697 | 1 |
| neuron development                                               | 9.36 | 6.67 | 0.3955965 | 1 |
| negative regulation of programmed cell death                     | 6.4  | 4    | 0.4111837 | 1 |
| cytosolic calcium ion homeostasis                                | 1.23 | 2    | 0.4503502 | 1 |
| regulation of activated T cell proliferation                     | 0.25 | 0.67 | 0.4671398 | 1 |
| astrocyte differentiation                                        | 0.25 | 0.67 | 0.4671398 | 1 |
| L-phenylalanine catabolic process                                | 0.25 | 0.67 | 0.4671398 | 1 |
| mast cell degranulation                                          | 0.25 | 0.67 | 0.4671398 | 1 |
| norepinephrine metabolic process                                 | 0.25 | 0.67 | 0.4671398 | 1 |



|                                                          |      |      |           |   |
|----------------------------------------------------------|------|------|-----------|---|
| regulation of S phase of mitotic cell cycle              | 0.25 | 0.67 | 0.4671398 | 1 |
| protein targeting to lysosome                            | 0.25 | 0.67 | 0.4671398 | 1 |
| regulation of ARF protein signal transduction            | 0.25 | 0.67 | 0.4671398 | 1 |
| phospholipase C activation                               | 0.25 | 0.67 | 0.4671398 | 1 |
| substrate-bound cell migration, cell extension           | 0.25 | 0.67 | 0.4671398 | 1 |
| positive regulation of JAK-STAT cascade                  | 0.25 | 0.67 | 0.4671398 | 1 |
| glutamate transport                                      | 0.25 | 0.67 | 0.4671398 | 1 |
| regulation of glial cell differentiation                 | 0.25 | 0.67 | 0.4671398 | 1 |
| apocarotenoid metabolic process                          | 0.25 | 0.67 | 0.4671398 | 1 |
| negative regulation of neurogenesis                      | 0.25 | 0.67 | 0.4671398 | 1 |
| positive regulation of receptor mediated endocytosis     | 0.25 | 0.67 | 0.4671398 | 1 |
| negative regulation of cyclin-dependent protein kinase : | 0.25 | 0.67 | 0.4671398 | 1 |
| tRNA splicing                                            | 0.25 | 0.67 | 0.4671398 | 1 |
| regulation of interferon-gamma biosynthetic process      | 0.25 | 0.67 | 0.4671398 | 1 |
| regulation of BMP signaling pathway                      | 0.25 | 0.67 | 0.4671398 | 1 |
| regulation of calcium ion transport                      | 0.25 | 0.67 | 0.4671398 | 1 |
| regulation of mRNA stability                             | 0.25 | 0.67 | 0.4671398 | 1 |
| diacylglycerol biosynthetic process                      | 0.25 | 0.67 | 0.4671398 | 1 |
| glycosphingolipid catabolic process                      | 0.25 | 0.67 | 0.4671398 | 1 |
| axon cargo transport                                     | 0.25 | 0.67 | 0.4671398 | 1 |
| angiogenesis                                             | 4.93 | 3.33 | 0.4971736 | 1 |
| peptidyl-tyrosine phosphorylation                        | 1.72 | 2.67 | 0.4983115 | 1 |
| L-fucose metabolic process                               | 0.74 | 0    | 0.5671713 | 1 |
| positive regulation of positive chemotaxis               | 0.74 | 0    | 0.5671713 | 1 |
| mismatch repair                                          | 0.74 | 0    | 0.5671713 | 1 |
| tRNA aminoacylation for protein translation              | 0.74 | 0    | 0.5671713 | 1 |
| energy coupled proton transport, down electrochemical    | 0.74 | 0    | 0.5671713 | 1 |
| actin filament bundle formation                          | 0.74 | 0    | 0.5671713 | 1 |
| immune response-activating signal transduction           | 0.99 | 0    | 0.5783899 | 1 |
| DNA damage checkpoint                                    | 0.99 | 0    | 0.5783899 | 1 |
| transcription initiation from RNA polymerase II promote  | 0.99 | 0    | 0.5783899 | 1 |
| negative regulation of cell growth                       | 0.99 | 0    | 0.5783899 | 1 |
| regulation of interleukin-6 biosynthetic process         | 0.99 | 0    | 0.5783899 | 1 |
| chromatin remodeling                                     | 0.99 | 0    | 0.5783899 | 1 |
| protein import into nucleus                              | 2.96 | 4    | 0.5901606 | 1 |
| meiosis I                                                | 0.74 | 1.33 | 0.6152426 | 1 |

|                                                                           |      |      |           |   |
|---------------------------------------------------------------------------|------|------|-----------|---|
| regulation of interleukin-2 biosynthetic process                          | 0.74 | 1.33 | 0.6152426 | 1 |
| ceramide metabolic process                                                | 0.74 | 1.33 | 0.6152426 | 1 |
| positive regulation of MAPK activity                                      | 0.74 | 1.33 | 0.6152426 | 1 |
| positive regulation of phosphorylation                                    | 0.74 | 1.33 | 0.6152426 | 1 |
| myelination                                                               | 0.74 | 1.33 | 0.6152426 | 1 |
| dopamine metabolic process                                                | 0.74 | 1.33 | 0.6152426 | 1 |
| actin filament polymerization                                             | 0.99 | 1.33 | 0.6631452 | 1 |
| positive regulation of T cell proliferation                               | 0.99 | 1.33 | 0.6631452 | 1 |
| regulation of actin polymerization and/or depolymerization                | 0.99 | 1.33 | 0.6631452 | 1 |
| epidermis morphogenesis                                                   | 1.72 | 0.67 | 0.6889394 | 1 |
| protein amino acid N-linked glycosylation                                 | 1.72 | 0.67 | 0.6889394 | 1 |
| glucose catabolic process                                                 | 1.72 | 0.67 | 0.6889394 | 1 |
| positive regulation of cytokine biosynthetic process                      | 1.48 | 2    | 0.7080766 | 1 |
| positive regulation of I-kappaB kinase/NF-kappaB cascade                  | 2.71 | 2    | 0.7684468 | 1 |
| regulation of Rho protein signal transduction                             | 3.45 | 2.67 | 0.7910422 | 1 |
| leukocyte differentiation                                                 | 4.19 | 4.67 | 0.8155387 | 1 |
| negative regulation of transcription, DNA-dependent                       | 6.9  | 6    | 0.8485424 | 1 |
| neutrophil apoptosis                                                      | 0.25 | 0    | 1         | 1 |
| regulation of granulocyte macrophage colony-stimulating factor production | 0.49 | 0    | 1         | 1 |
| regulation of microtubule polymerization or depolymerization              | 0.25 | 0    | 1         | 1 |
| positive regulation of translational initiation                           | 0.25 | 0    | 1         | 1 |
| ectodermal gut morphogenesis                                              | 0.49 | 0    | 1         | 1 |
| peptidyl-tyrosine sulfation                                               | 0.25 | 0    | 1         | 1 |
| RNA export from nucleus                                                   | 0.25 | 0    | 1         | 1 |
| endoplasmic reticulum calcium ion homeostasis                             | 0.25 | 0    | 1         | 1 |
| primary neural tube formation                                             | 0.49 | 0.67 | 1         | 1 |
| Cdc42 protein signal transduction                                         | 0.25 | 0    | 1         | 1 |
| catecholamine uptake during transmission of nerve impulse                 | 0.25 | 0    | 1         | 1 |
| NADP metabolic process                                                    | 0.49 | 0    | 1         | 1 |
| amyloid precursor protein catabolic process                               | 0.25 | 0    | 1         | 1 |
| entry of virus into host cell                                             | 0.49 | 0    | 1         | 1 |
| copper ion homeostasis                                                    | 0.49 | 0    | 1         | 1 |
| regulation of interleukin-13 biosynthetic process                         | 0.25 | 0    | 1         | 1 |
| glucose import                                                            | 0.25 | 0    | 1         | 1 |
| GTP metabolic process                                                     | 0.49 | 0.67 | 1         | 1 |
| thymidine catabolic process                                               | 0.25 | 0    | 1         | 1 |

|                                                             |      |      |   |   |
|-------------------------------------------------------------|------|------|---|---|
| transcription initiation from RNA polymerase III promote    | 0.25 | 0    | 1 | 1 |
| zinc ion transport                                          | 0.25 | 0    | 1 | 1 |
| energy coupled proton transport, against electrochemic      | 0.49 | 0    | 1 | 1 |
| regulation of transforming growth factor beta receptor s    | 0.49 | 0    | 1 | 1 |
| regulation of JNK activity                                  | 0.25 | 0    | 1 | 1 |
| glutamate secretion                                         | 0.25 | 0    | 1 | 1 |
| mitotic spindle organization and biogenesis                 | 0.25 | 0    | 1 | 1 |
| skin development                                            | 0.25 | 0    | 1 | 1 |
| vasculogenesis                                              | 0.74 | 0.67 | 1 | 1 |
| misfolded or incompletely synthesized protein catabolic     | 0.25 | 0    | 1 | 1 |
| regulation of leukocyte mediated cytotoxicity               | 0.49 | 0.67 | 1 | 1 |
| L-serine biosynthetic process                               | 0.49 | 0    | 1 | 1 |
| regulation of protein amino acid phosphorylation            | 1.23 | 1.33 | 1 | 1 |
| gastrulation (sensu Mammalia)                               | 0.49 | 0    | 1 | 1 |
| microtubule polymerization                                  | 0.25 | 0    | 1 | 1 |
| spermatid nuclear differentiation                           | 0.25 | 0    | 1 | 1 |
| cytolysis of cells of another organism                      | 0.25 | 0    | 1 | 1 |
| lamellipodium biogenesis                                    | 0.49 | 0    | 1 | 1 |
| mitotic anaphase                                            | 0.25 | 0    | 1 | 1 |
| positive regulation of lymphocyte mediated immunity         | 0.25 | 0    | 1 | 1 |
| killing of cells in other organism during symbiotic interac | 0.25 | 0    | 1 | 1 |
| positive regulation of pinocytosis                          | 0.49 | 0    | 1 | 1 |
| microtubule depolymerization                                | 0.25 | 0    | 1 | 1 |
| fucose biosynthetic process                                 | 0.25 | 0    | 1 | 1 |
| natural killer cell mediated immune response to tumor c     | 0.25 | 0    | 1 | 1 |
| regulation of chromatin assembly or disassembly             | 0.25 | 0    | 1 | 1 |
| regulation of cyclic nucleotide biosynthetic process        | 0.25 | 0    | 1 | 1 |
| activated T cell apoptosis                                  | 0.25 | 0    | 1 | 1 |
| regulation of Ras GTPase activity                           | 0.25 | 0    | 1 | 1 |
| chondroitin sulfate biosynthetic process                    | 0.25 | 0    | 1 | 1 |
| regulation of interleukin-3 biosynthetic process            | 0.25 | 0    | 1 | 1 |
| phosphatidylcholine metabolic process                       | 0.25 | 0    | 1 | 1 |
| regulation of interleukin-1 beta secretion                  | 0.49 | 0    | 1 | 1 |
| positive regulation of alpha-beta T cell activation         | 0.25 | 0    | 1 | 1 |
| negative regulation of striated muscle development          | 0.49 | 0    | 1 | 1 |
| positive regulation of nucleocytoplasmic transport          | 0.25 | 0    | 1 | 1 |

|                                                          |      |      |   |   |
|----------------------------------------------------------|------|------|---|---|
| regulation of neuron differentiation                     | 1.72 | 1.33 | 1 | 1 |
| positive regulation of gamma-delta T cell activation     | 0.25 | 0    | 1 | 1 |
| covalent chromatin modification                          | 1.23 | 0.67 | 1 | 1 |
| positive regulation of MHC class II biosynthetic process | 0.25 | 0    | 1 | 1 |
| apoptotic program                                        | 1.97 | 1.33 | 1 | 1 |
| negative regulation of cytokine biosynthetic process     | 0.49 | 0.67 | 1 | 1 |
| protein targeting to vacuole                             | 0.25 | 0    | 1 | 1 |
| regulation of natural killer cell mediated immunity      | 0.25 | 0    | 1 | 1 |
| prostanoid metabolic process                             | 0.49 | 0    | 1 | 1 |
| insulin processing                                       | 0.25 | 0    | 1 | 1 |
| embryonic eye morphogenesis                              | 0.25 | 0    | 1 | 1 |
| fucose catabolic process                                 | 0.49 | 0    | 1 | 1 |
| regulation of epidermal growth factor receptor activity  | 0.49 | 0    | 1 | 1 |
| neuron apoptosis                                         | 0.49 | 0    | 1 | 1 |
| negative regulation of gonadotropin secretion            | 0.25 | 0    | 1 | 1 |
| glycerophospholipid biosynthetic process                 | 0.49 | 0.67 | 1 | 1 |
| T cell costimulation                                     | 0.25 | 0    | 1 | 1 |
| regulation of synaptic transmission, glutamatergic       | 0.25 | 0    | 1 | 1 |
| determination of anterior/posterior axis, embryo         | 0.25 | 0    | 1 | 1 |
| positive regulation of interleukin-1 secretion           | 0.49 | 0    | 1 | 1 |
| neuroblast proliferation (sensu Vertebrata)              | 0.25 | 0    | 1 | 1 |
| GDP-mannose metabolic process                            | 0.25 | 0    | 1 | 1 |
| oocyte maturation                                        | 0.49 | 0    | 1 | 1 |
| protein palmitoylation                                   | 0.25 | 0    | 1 | 1 |
| regulation of interleukin-8 biosynthetic process         | 0.25 | 0    | 1 | 1 |
| protein targeting to membrane                            | 0.25 | 0    | 1 | 1 |
| triacylglycerol mobilization                             | 0.25 | 0    | 1 | 1 |
| positive regulation of Ras protein signal transduction   | 0.25 | 0    | 1 | 1 |
| serotonin secretion                                      | 0.25 | 0    | 1 | 1 |
| spindle assembly                                         | 0.25 | 0    | 1 | 1 |
| arginine biosynthetic process                            | 0.25 | 0    | 1 | 1 |
| chromatin disassembly                                    | 0.25 | 0    | 1 | 1 |
| endosome to lysosome transport                           | 0.25 | 0    | 1 | 1 |
| regulation of chemokine biosynthetic process             | 0.25 | 0    | 1 | 1 |
| positive regulation of gonadotropin secretion            | 0.25 | 0    | 1 | 1 |
| iron ion homeostasis                                     | 0.49 | 0    | 1 | 1 |

|                                                            |      |      |   |   |
|------------------------------------------------------------|------|------|---|---|
| negative regulation of cyclic nucleotide metabolic process | 0.25 | 0    | 1 | 1 |
| inflammatory cell apoptosis                                | 0.49 | 0    | 1 | 1 |
| gluconeogenesis                                            | 0.49 | 0    | 1 | 1 |
| embryonic gut morphogenesis                                | 0.49 | 0.67 | 1 | 1 |
| catecholamine secretion                                    | 0.25 | 0    | 1 | 1 |
| sequestering of calcium ion                                | 0.25 | 0    | 1 | 1 |
| somatic recombination of immunoglobulin gene segments      | 0.49 | 0    | 1 | 1 |
| purine ribonucleoside triphosphate biosynthetic process    | 1.23 | 1.33 | 1 | 1 |
| positive regulation of DNA replication                     | 0.25 | 0    | 1 | 1 |
| regulation of neurotransmitter secretion                   | 0.74 | 0.67 | 1 | 1 |
| tyrosine catabolic process                                 | 0.25 | 0    | 1 | 1 |
| negative regulation of I-kappaB kinase/NF-kappaB cascade   | 0.25 | 0    | 1 | 1 |
| cysteine biosynthetic process                              | 0.25 | 0    | 1 | 1 |
| regulation of cellular pH                                  | 0.25 | 0    | 1 | 1 |
| regulation of follicle-stimulating hormone secretion       | 0.25 | 0    | 1 | 1 |
| negative regulation of gliogenesis                         | 0.25 | 0    | 1 | 1 |
| modification by symbiont of host cell membrane             | 0.25 | 0    | 1 | 1 |
| acetylcholine metabolic process                            | 0.25 | 0    | 1 | 1 |
| mRNA polyadenylation                                       | 0.49 | 0    | 1 | 1 |
| succinyl-CoA pathway                                       | 0.25 | 0    | 1 | 1 |
| immunoglobulin mediated immune response                    | 1.23 | 0.67 | 1 | 1 |
| icosanoid biosynthetic process                             | 0.74 | 0.67 | 1 | 1 |
| positive regulation of calcium-mediated signaling          | 0.25 | 0    | 1 | 1 |
| negative regulation of MHC class II biosynthetic process   | 0.25 | 0    | 1 | 1 |
| ovarian follicle development                               | 0.49 | 0    | 1 | 1 |
| regulation of JNK cascade                                  | 0.49 | 0    | 1 | 1 |
| CTP metabolic process                                      | 0.49 | 0.67 | 1 | 1 |
| negative regulation of B cell proliferation                | 0.49 | 0    | 1 | 1 |
| protein targeting to mitochondrion                         | 0.25 | 0    | 1 | 1 |
| transmembrane receptor protein tyrosine kinase activation  | 0.25 | 0    | 1 | 1 |
| NAD metabolic process                                      | 0.49 | 0    | 1 | 1 |
| negative regulation of T cell proliferation                | 0.49 | 0    | 1 | 1 |
| mitotic sister chromatid segregation                       | 0.49 | 0.67 | 1 | 1 |
| fibrinolysis                                               | 0.49 | 0    | 1 | 1 |
| hemocyte differentiation (sensu Arthropoda)                | 0.25 | 0    | 1 | 1 |
| negative regulation of DNA replication                     | 0.25 | 0    | 1 | 1 |

|                                                               |      |      |   |   |
|---------------------------------------------------------------|------|------|---|---|
| regulation of odontogenesis (sensu Vertebrata)                | 0.25 | 0    | 1 | 1 |
| negative regulation of nucleocytoplasmic transport            | 0.49 | 0    | 1 | 1 |
| positive regulation of phosphoinositide 3-kinase activity     | 0.25 | 0    | 1 | 1 |
| positive regulation of striated muscle development            | 0.25 | 0    | 1 | 1 |
| negative regulation of phosphorylation                        | 0.25 | 0    | 1 | 1 |
| negative regulation of MAPK activity                          | 0.74 | 0.67 | 1 | 1 |
| positive regulation of transcription factor activity          | 0.49 | 0.67 | 1 | 1 |
| glycosphingolipid biosynthetic process                        | 0.49 | 0    | 1 | 1 |
| regulation of cAMP metabolic process                          | 0.49 | 0    | 1 | 1 |
| regulation of fatty acid oxidation                            | 0.25 | 0    | 1 | 1 |
| peptidyl-threonine phosphorylation                            | 0.25 | 0    | 1 | 1 |
| iron ion transport                                            | 0.74 | 0.67 | 1 | 1 |
| copper ion transport                                          | 0.25 | 0    | 1 | 1 |
| myeloid cell differentiation                                  | 3.2  | 3.33 | 1 | 1 |
| regulation of interleukin-12 biosynthetic process             | 0.49 | 0.67 | 1 | 1 |
| eye morphogenesis (sensu Vertebrata)                          | 0.25 | 0    | 1 | 1 |
| embryonic arm morphogenesis                                   | 0.25 | 0    | 1 | 1 |
| Golgi to endosome transport                                   | 0.25 | 0    | 1 | 1 |
| positive regulation of leukocyte degranulation                | 0.25 | 0    | 1 | 1 |
| negative regulation of nucleotide biosynthetic process        | 0.25 | 0    | 1 | 1 |
| male meiosis                                                  | 0.25 | 0    | 1 | 1 |
| peptidyl-diphthamide metabolic process                        | 0.25 | 0    | 1 | 1 |
| ATP metabolic process                                         | 0.74 | 0.67 | 1 | 1 |
| RNA splicing, via transesterification reactions with bulge    | 1.23 | 1.33 | 1 | 1 |
| regulation of insulin receptor signaling pathway              | 0.25 | 0    | 1 | 1 |
| establishment of T cell polarity                              | 0.25 | 0    | 1 | 1 |
| establishment of epithelial cell polarity                     | 0.25 | 0    | 1 | 1 |
| regulation of alpha-beta T cell proliferation                 | 0.25 | 0    | 1 | 1 |
| cilium biogenesis                                             | 0.25 | 0    | 1 | 1 |
| regulation of tumor necrosis factor-beta biosynthetic process | 0.25 | 0    | 1 | 1 |
| complement activation                                         | 0.99 | 0.67 | 1 | 1 |
| transformed cell apoptosis                                    | 0.49 | 0    | 1 | 1 |
| regulation of interleukin-1 biosynthetic process              | 0.25 | 0    | 1 | 1 |
| mitotic metaphase/anaphase transition                         | 0.25 | 0    | 1 | 1 |
| mitotic metaphase                                             | 0.25 | 0    | 1 | 1 |
| histidine catabolic process                                   | 0.49 | 0.67 | 1 | 1 |

|                                                           |      |      |   |   |
|-----------------------------------------------------------|------|------|---|---|
| glycogen biosynthetic process                             | 0.25 | 0    | 1 | 1 |
| long-chain fatty acid biosynthetic process                | 0.25 | 0    | 1 | 1 |
| midbrain-hindbrain boundary development                   | 0.25 | 0    | 1 | 1 |
| UTP metabolic process                                     | 0.49 | 0.67 | 1 | 1 |
| pyrimidine ribonucleoside triphosphate biosynthetic pro   | 0.49 | 0.67 | 1 | 1 |
| regulation of interleukin-4 biosynthetic process          | 0.25 | 0    | 1 | 1 |
| female meiosis                                            | 0.49 | 0    | 1 | 1 |
| positive regulation of fatty acid metabolic process       | 0.25 | 0    | 1 | 1 |
| osteoblast differentiation                                | 0.74 | 0.67 | 1 | 1 |
| purine ribonucleoside diphosphate biosynthetic process    | 0.25 | 0    | 1 | 1 |
| serotonin metabolic process                               | 0.25 | 0    | 1 | 1 |
| eye photoreceptor cell differentiation                    | 0.49 | 0.67 | 1 | 1 |
| regulation of fibroblast growth factor receptor signaling | 0.25 | 0    | 1 | 1 |
| negative regulation of Ras protein signal transduction    | 0.25 | 0    | 1 | 1 |
